1 Regulation of Vacuole Morphology by PIEZO Channels in Spreading Earth Moss

2

3 Ivan Radin<sup>1,2</sup>, Ryan A. Richardson<sup>1,2</sup>, Ethan R. Weiner<sup>1±</sup>, Carlisle S. Bascom<sup>3#</sup>, Magdalena  
4 Bezanilla<sup>3</sup>, Elizabeth S. Haswell<sup>\*1,2</sup>

5

6 <sup>1</sup>Department of Biology, Washington University in St. Louis, MO USA.

7 <sup>2</sup>NSF Center for Engineering Mechanobiology

8 <sup>3</sup>Department of Biological Sciences, Dartmouth College, USA.

9 \*Corresponding author: [ehaswell@wustl.edu](mailto:ehaswell@wustl.edu)

10 ±Current address: Botany Department, University of Wisconsin–Madison, USA.

11 #Current address: Division of Biological Sciences, University of California San Diego, USA.

12

13 **Abstract**

14 The perception of mechanical force is a fundamental property of most, if not all cells. PIEZO  
15 channels are plasma membrane-embedded mechanosensitive calcium channels that play diverse  
16 and essential roles in mechanobiological processes in animals<sup>1,2</sup>. PIEZO channel homologs are  
17 found in plants<sup>3,4</sup>, but their role(s) in the green lineage are almost completely unknown. Plants  
18 and animals diverged approximately 1.5 billion years ago, independently evolved multicellularity,  
19 and have vastly different cellular mechanics<sup>5</sup>. Here, we investigate PIEZO channel function in the  
20 moss *Physcomitrium patens*, a representative of one of the first land plant lineages. *PpPIEZO1*  
21 and *PpPIEZO2* were redundantly required for normal growth, size, and shape of tip-growing  
22 caulonema cells. Both were localized to vacuolar membranes and facilitated the release of  
23 calcium into the cytosol in response to hypoosmotic shock. Loss-of-function ( $\Delta Pppiezo1/2$ ) and  
24 gain-of-function (*PpPIEZO2-R2508K* and *-R2508H*) mutants revealed a role for moss PIEZO  
25 homologs in regulating vacuole morphology. Our work here shows that plant and animal PIEZO  
26 homologs have diverged in both subcellular localization and in function, likely co-opted to serve  
27 different needs in each lineage. The plant homologs of PIEZO channels thus provide a compelling  
28 lens through which to study plant mechanobiology and the evolution of mechanoperceptive  
29 strategies in multicellular eukaryotes.

30

31 The ability to sense and respond to mechanical forces like gravity, touch, or cell swelling is an  
32 ancient property essential for normal cellular function<sup>6</sup>. Externally or internally derived forces can  
33 lead to increased lateral membrane tension, activating mechanosensitive (MS) channels and  
34 leading to the flow of ions down their electrochemical gradients<sup>7-9</sup>. Members of the PIEZO family  
35 of MS ion channels form large trimeric complexes embedded in the plasma membrane that  
36 conduct calcium<sup>1-3</sup>. In animals, PIEZO channels are required for the perception of light touch,  
37 shear stress, and compressive force, proprioception, brain development, red blood cell volume  
38 control, and nociception (reviewed in<sup>1,2</sup>).

39

40 PIEZO channel homologs are found throughout eukaryotic genomes<sup>3,4,10</sup> but have been little  
41 studied outside animals. AtPIEZO1, a PIEZO homolog in the genome of the model flowering plant  
42 *Arabidopsis thaliana* is required to control the systemic spread of viruses<sup>4</sup>, but the mechanism is  
43 not known. How PIEZO channels might function in the green lineage (here defined to include  
44 green algae and land plants) is a particularly compelling question given the biomechanics of the  
45 plant cell: a large intracellular vacuole that presses the cytoplasm and plasma membrane against  
46 a sturdy yet flexible cell wall with up to a thousand-fold higher osmotic pressure than animal cells.  
47 Here, we report the first study of PIEZO channel function in the model plant *Physcomitrium*  
48 (formerly *Physcomitrella*) *patens*. This moss species has emerged as an exciting model system  
49 due to its phylogenetic position as an early land plant; its utility for studying development, tip-  
50 growth, water stress responses, and ease of imaging and genetic manipulations<sup>11</sup>.

51

## 52 **Phylogenetic analysis of plant and animal PIEZO homologs**

53 To generate an updated phylogenetic tree of eukaryotic PIEZO homologs, protein sequences  
54 were selected from public databases based on multiple criteria: homology to mouse mPiezo1 and  
55 mPiezo2, large size (> 1800 amino acids), > 11 transmembrane helices, and to represent the  
56 diversity of eukaryotic lineages (Supplementary Table 1). Both Maximum Likelihood (Fig. 1a,  
57 Supplementary Fig. 1) and Neighbor-Joining (Supplementary Fig. 3) trees based on the  
58 conserved C-terminal domain (Extended Data Fig. 1b) show that modern PIEZO proteins  
59 descended from a single ancestor and that plant and animal homologs diverged very early,  
60 providing evolutionary space for specialization and diversification of function. In addition, they  
61 support a model of repeated duplication and loss events of PIEZO homologs in multiple eukaryotic  
62 lineages. Maximum likelihood trees based on full protein sequences further support duplications  
63 of the ancestral *PIEZO* gene in one genus of green algae; in mosses; in basal eudicots; and in  
64 core eudicots (Extended Data Fig. 1a, Supplementary Fig. 2). In each case, we named the

65 subfamilies PIEZO1 and PIEZO2. In core eudicots, this ancestral duplication was followed by at  
 66 least seven subsequent independent PIEZO1 duplication events. At the same time, Eudicot  
 67 PIEZO2 was lost in at least 11 lineages. As a result, extant core eudicots have between 1 and 3  
 68 *PIEZO* homologs.  
 69

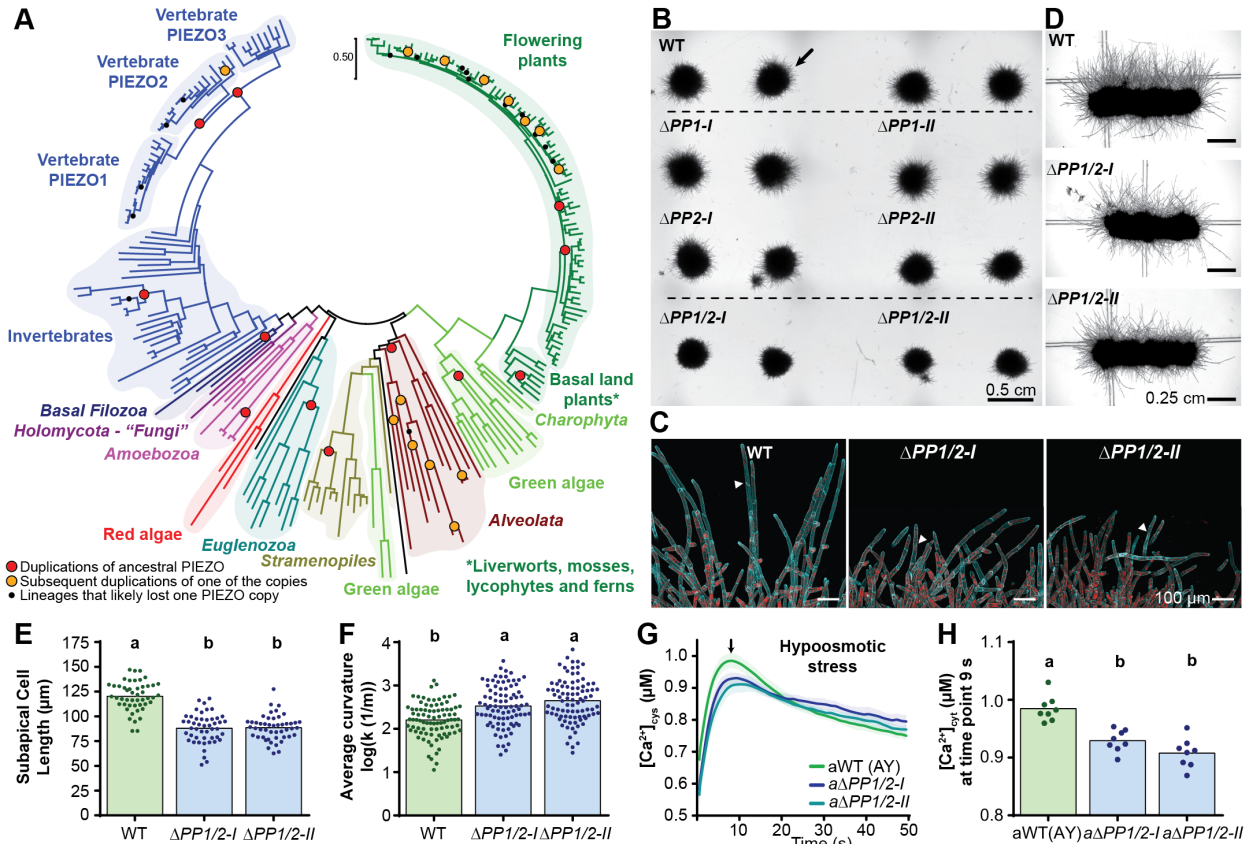

**Figure 1. Moss PIEZO homologs are required for normal cell growth and cytosolic calcium transients**

**a.** Maximum likelihood phylogenetic tree of 235 PIEZO homologs. **b.** Moss from fragmented protonema, grown for 7 days on cellophaned media. Black arrow, spreading caulonema filaments. **c.** Deconvolved Z-maximum intensity projections of cells at the plant edge. Cyan, calcofluor-white; red, chlorophyll autofluorescence. Arrowheads, oblique cross walls. **d.** Plants grown in the dark. **e.** Subapical caulonemal cell length. **f.** Curvature of caulonemal filaments. **g.** Average  $[Ca^{2+}]_{cyt} \pm$ SD (shaded area) in response to hypoosmotic shock. **h.** Quantification of  $[Ca^{2+}]_{cyt}$  9 s after shock in g. Statistics, one-way ANOVA with post-hoc Tukey test,  $p < 0.05$ .

70

71

## 72 Moss PIEZO homologs are redundantly required for caulonemal tip growth

73 We identified two PIEZO homologs encoded in the genome of *P. patens*, *PpPIEZO1* (encoded by  
 74 *Pp3c9\_13300V3.1*) and *PpPIEZO2* (encoded by *Pp3c3\_17170V3.1*). They share 57% full-length  
 75 protein sequence identity to each other, 20% identity to both mouse mPiezo1 and mPiezo2 and  
 76 41% to Arabidopsis PIEZO1. Single ( $\Delta PP1-I$ ,  $\Delta PP1-II$ ,  $\Delta PP2-I$  and  $\Delta PP2-II$ ; for *Physcomitrium*  
 77 **PIEZO**) and double ( $\Delta PP1/2-I$  and  $\Delta PP1/2-II$ ) mutant lines were generated using CRISPR/Cas9  
 78 gene editing (Extended Data Fig. 1c, Supplementary Table 2). When cultured on standard media



79 with cellophane,  $\Delta PP1$  and  $\Delta PP2$  single mutant plants were similar in size to the WT, but double  
80  $\Delta PP1/2$  mutants were significantly smaller (Extended Data Fig. 1d). The most striking difference  
81 was in the filaments that spread away from the edge of the main plant, which were much shorter  
82 and less abundant (Fig. 1b, black arrow). Staining with a cell wall dye (Calcofluor-white) showed  
83 that those filaments were mostly comprised of caulonemal cells (Fig. 1c, note the oblique cross  
84 walls, white arrowheads). Caulonemal cells are one of the two cell types that form moss juvenile  
85 (protonema) tissue and are tasked with plant spreading<sup>12</sup>. In the dark, where only caulonemal  
86 cells grow,  $\Delta PP1/2$  mutants exhibited fewer and shorter filaments in comparison to WT (Fig. 1d).  
87  $\Delta PP1/2$  caulonemal cells grew 30% more slowly than WT (Extended Data Fig. 1e, Supplementary  
88 Fig. 4). Furthermore,  $\Delta PP1/2$  subapical caulonemal cells were approximately 25% shorter than  
89 WT (Fig. 1e) with the same cell width (Extended Data Fig. 1f).  $\Delta PP1/2$  filaments were also  
90 significantly curvier (Fig. 1f). A third independently generated  $\Delta PP1/2$  mutant line (Supplementary  
91 Table 2) showed similar growth defects (Extended Data Fig. 1g, h).

92

### 93 ***PpPIEZO1* and *PpPIEZO2* contribute to cytosolic calcium transients induced by** 94 **hypoosmotic shock.**

95 Animal PIEZO channels allow for the influx of the cytosolic calcium ( $[Ca^{2+}]_{cyt}$ ) that is observed in  
96 response to hypo-osmotic shock and membrane stretch in a range of cultured cells<sup>13</sup>. To  
97 determine if *PpPIEZO1* and *PpPIEZO2* have a similar function, we generated double mutants in  
98 moss lines expressing a cytosolic version of the calcium sensor aequorin-YFP (AY)<sup>14</sup>, *a $\Delta PP1/2-I$*   
99 and *a $\Delta PP1/2-II$*  (Supplementary Table 2) and tested their response to hypo-osmotic shock  
100 (Extended Data Fig. 2a). WT plants expressing AY (*aWT*) showed a dramatic increase in cytosolic  
101 calcium concentration in response to hypoosmotic, but not iso-osmotic, treatment (Fig. 1g,  
102 Extended Data Fig. 2b-d). These  $[Ca^{2+}]_{cyt}$  responses were dampened in *a $\Delta PP1/2-I$*  and *a $\Delta PP1/2-II$*   
103 cells. At its maximum, 9 s after the shock, cytosolic calcium concentrations were significantly  
104 lower (~7.5%) in *a $\Delta PP1/2-I$*  and *a $\Delta PP1/2-II$*  lines than in *aWT* (Fig. 1h), indicating that *PpPIEZO*  
105 double mutants released less calcium into their cytoplasm in response to hypo-osmotic shock  
106 compared with *aWT*.

107

### 108 ***PpPIEZO1* and *PpPIEZO2* localize to the vacuolar membrane.**

109 We expected that *P. patens* PIEZO homologs would localize to the plasma membrane, like their  
110 animal counterparts<sup>3,16</sup>. However, *P. patens* protoplasts transiently expressing codon-optimized  
111 *oPpPIEZO1* or *oPpPIEZO2* tagged with monomeric enhanced GFP (hereafter referred to as  
112 mGFP) from the maize *UBQ* promoter exhibited mGFP signal between the cytoplasm (marked

113 with cytoplasmic mCherry) and the large central vacuole (void of signal) (Fig. 2a, left and middle  
 114 panels, Extended Data Fig. 3a), closely resembling the vacuolar marker *Vam3-mGFP* (Fig. 2a,  
 115 right panel). To validate this result, we used homologous recombination to add the coding  
 116 sequence of *mGFP* to the 3' ends of the *PpPIEZO1* and *PpPIEZO2* native loci (Extended Data  
 117 Fig. 1c) to make *gPpPIEZO1-mGFP* and *gPpPIEZO2-mGFP* knock-in lines (Supplementary Table  
 118 2). Immunoblots indicated that full-length fusion proteins were present in all lines (Fig. 2b), and  
 119 they grew normally (Extended Data Fig. 3b). *gPpPIEZO1/2-mGFP* localized to the vacuolar  
 120 membrane, in subapical and apical caulonemal cells (Fig. 2c, Extended Data Fig. 3c) and  
 121 chloronemal cells (Supplementary Fig. 5). Chloronemal cells are the second cell type of  
 122 protonemal tissue and the main site of photosynthesis<sup>12</sup>. Finally, stable, constitutive expression  
 123 of mGFP-fused, codon-optimized PIEZO homologs from moss (*oPpPIEZO1* and *oPpPIEZO2*)  
 124 and from the dicot *Arabidopsis thaliana* (*oAtPIEZO1*) produced a localization pattern consistent  
 125 with vacuolar targeting (Fig. 2d, Extended Data Fig. 3d). Multiple cellular compartments contribute  
 126 to hypo-osmotic shock-induced  $[Ca^{2+}]_{\text{cyt}}$  transients<sup>15</sup>, and the vacuole is likely to contribute but not  
 127 dominate cytoplasmic calcium transients<sup>19,20</sup>. Thus, similar to previously characterized vacuolar  
 128 MS cation channels from plants (TPK<sup>17</sup>) and yeast (TRPY1<sup>18</sup>), *PpPIEZO1/2* channels likely  
 129 release  $Ca^{2+}$  from vacuolar stores in response to mechanical stimuli.  
 130

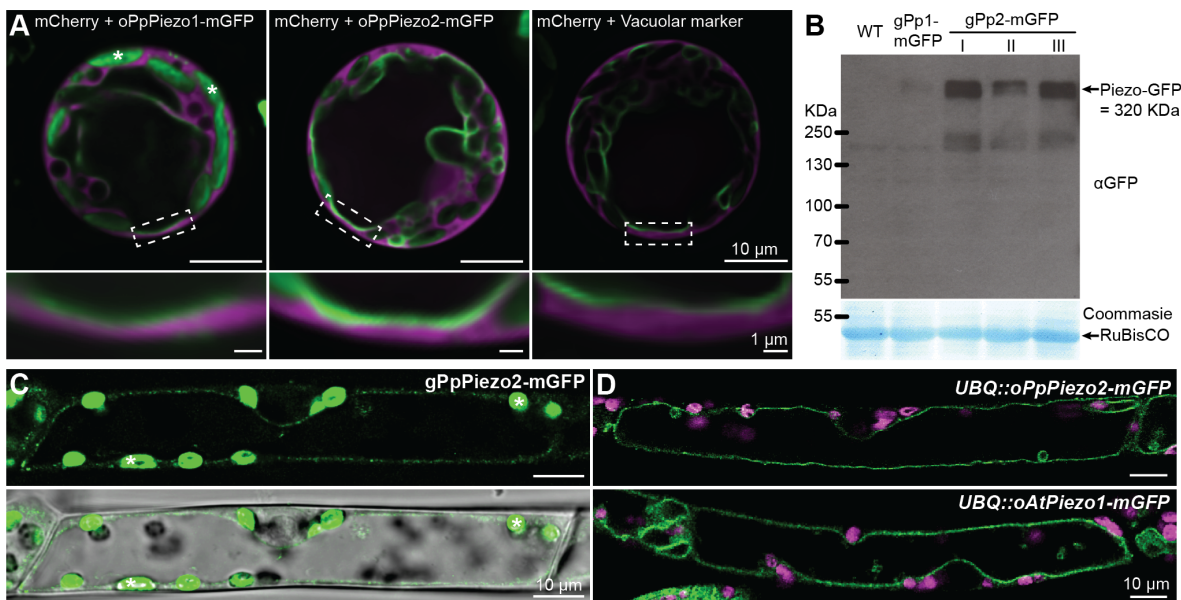

131

132 ***PpPIEZO1/2* are required for normal vacuolar morphology**

133 Vacuoles occupy most of the volume of many plant cells, store water, ions, and metabolites and  
 134 are an essential part of turgor pressure, protein degradation, and cytosolic pH maintenance<sup>21</sup>.

135 Vacuole morphology changes dynamically during development, growth, guard cell opening, and

in response to stresses<sup>22</sup>. Given the

unexpected localization of moss *PIEZO*

homologs, we investigated vacuolar

morphology in caulonemal cells in WT and

mutant lines using brightfield microscopy

(Fig. 3a, b), staining with 2',7'-Bis-(2-

Carboxyethyl)-5-(and-6)-

Carboxyfluorescein, Acetoxymethyl Ester

(BCECF), which accumulates in the vacuolar

lumen (Fig. 3c) and staining with MDY-64,

which, among other compartments, also

stains the vacuolar membrane (Fig. 3d). As

described previously<sup>23</sup>, we observed that in

the apical cells of WT moss caulonema, the

vacuole changed dynamically with the age of

the cell. In younger and shorter WT cells the

vacuole was in a highly tubulated or

fragmented form (Extended Data Fig. 4a). As

the apical cell elongated, the vacuole in the

region behind the nucleus combined into one

large central vacuole, while the region in the

apical portion of the cell remained tubule-like

in 90% of WT cells (top images in Fig 3a-d).

In contrast, we found that 50-60% of the

apical cells in single  $\Delta PP2-I$  and  $\Delta PP2-II$

mutants and >95% of the cells from double

$\Delta PP1/2-I$  and  $\Delta Pp1/2-III$  mutants contained

only large, expanded vacuoles in the apical

region (Fig. 3a-d, Extended Data Fig. 4b).

Sometimes we observed intravacuolar

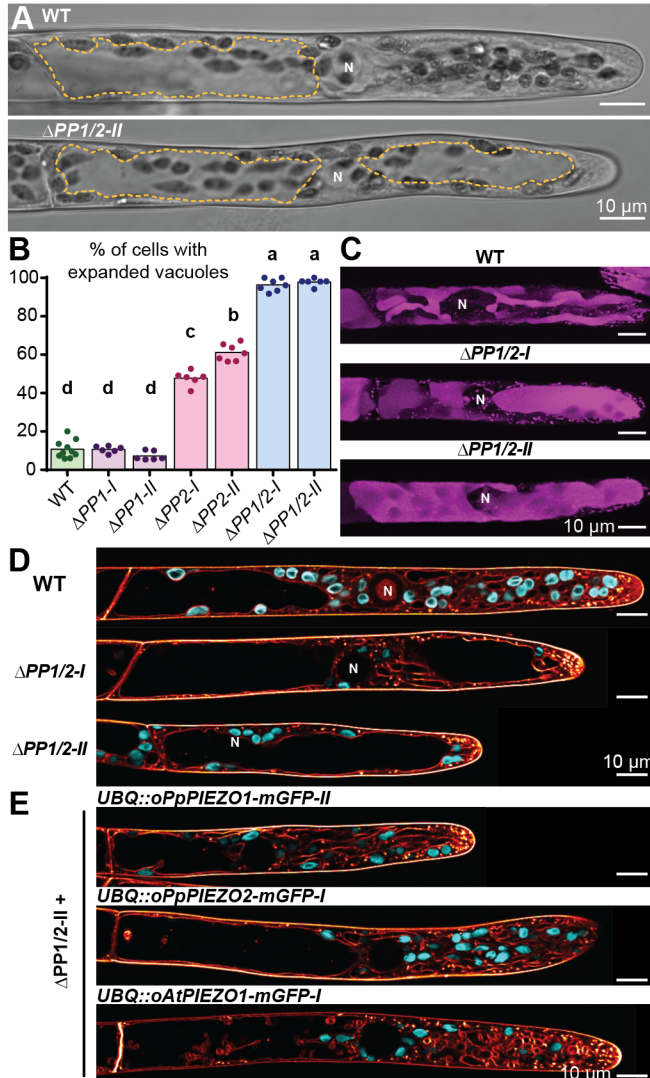

**Figure 3. *PpPIEZO* double mutants have altered vacuolar morphology.**

**a.** Brightfield images of WT and  $\Delta PP1/2-II$  apical caulonemal cells. Yellow lines, outline of expanded vacuoles. **b.** Percentage of cells with expanded vacuoles in the tip region. Statistics as in Fig. 1. **c.** Cells stained with BCECF (Z-maximum intensity projection). **d.** Confocal single plane images of cells stained with MDY64 (orange). Cyan, chlorophyll autofluorescence. **e.** Confocal single plane images of  $\Delta PP1/2-II$  cells expressing indicated constructs. Staining same as in **e**. All cells depicted are apical caulonemal cells. Fluorescence images were subjected to deconvolution. N, nucleus.

166 bubble-like structures (Extended Data Fig. 4b). A third  $\Delta PP1/2-III$  mutant line had the same  
167 vacuolar phenotype (Extended Data Fig. 4c, d). This vacuolar phenotype was independent of  
168 growth rate (Extended Data Fig. 4e). Other cell types like subapical caulonemal (Extended Data  
169 Fig. 4f) and all chloronemal cells (Supplementary Fig. 5) contain only large and expanded  
170 vacuoles. Codon-optimized *PpPIEZO1*, *PpPIEZO2* and *AtPIEZO1*, fused to *mGFP* and  
171 overexpressed from the *UBQ* promoter (Supplementary table 2) were able to rescue the vacuole  
172 phenotype of the  $\Delta PP1/2-II$  mutant (Fig. 3e; Extended Data Fig. 5a, b), suggesting a functional  
173 conservation among plant PIEZO homologs. Finally, the vacuolar morphology of apical  
174 caulonemal cells from *gPpPIEZO1-mGFP* and *gPpPIEZO2-mGFP* lines was indistinguishable  
175 from the WT (Extended Data Fig. 5c, d), indicating, together with the complementation  
176 experiments (Fig. 3e, Extended Data Fig. 5a, b), that GFP tagging did not alter protein function.

177

### 178 **Gain-of-function lesions in *PpPIEZO2* lead to complex intravacuolar membrane structures**

179 Multiple gain-of-function lesions in the conserved C-terminal domains of animal PIEZOs are  
180 associated with disease<sup>2</sup> (Fig. 4a, b). We introduced three such lesions, R2508K, R2508H, and  
181 E2548del, into the *PpPIEZO2* locus using CRISPR/Cas9 and oligodeoxynucleotide-assisted  
182 homology directed repair<sup>24</sup> generating multiple independent lines for each lesion (Supplementary  
183 Table 2). Plants harboring the *PpPIEZO2*-R2508K and -R2508H lesions, did not have any growth  
184 defects (Extended Data Fig. 6a, b), however, the vacuoles in the tip region of 60-70% of their  
185 caulonemal cells contained intravacuolar structures that were rarely observed in WT cells (Fig.  
186 4c,-g, Extended Data Fig. 6c). Even among *PpPIEZO2*-R2508K and -R2508H mutant cells with  
187 tubule-like vacuolar morphology, 40-60% had internal bubble-like structures, compared to 20% of  
188 the WT (Fig. 4e, arrows). In mutant caulonemal cells with expanded vacuoles, we observed  
189 complex internal membrane structures (17-32% of total cells; Fig. 4f, arrows) and membrane  
190 lamination (5% and 15% of total cells in R2508K and R2508H mutants, respectively; Fig. 4g,  
191 number sign). In some cases, cytoplasm and chloroplasts were observed inside vacuolar  
192 membranes (Fig. 4f, arrow heads). Lamination was never observed in the WT. *PpPIEZO2*  
193 E2548del did not show these effects, instead producing a loss-of-function phenotype similar to  
194  $\Delta PP2$  mutants (Extended Data Fig. 7).



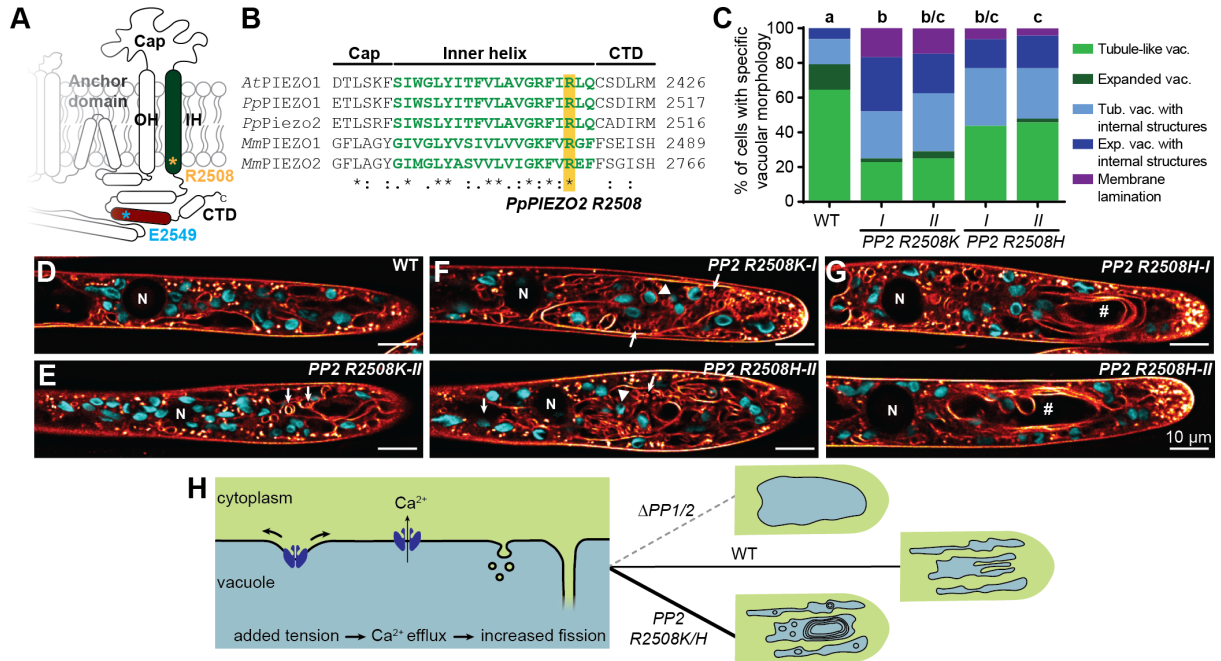

**Figure 4. Vacuoles of *PpPIEZO2* gain-of-function mutants have complex internal membrane structures.**

**a.** Diagram of PIEZO pore module. **b.** Alignment of inner helix protein sequences (*At*, *Arabidopsis*; *Pp*, moss; *Mm*, mouse). **c.** Quantitation of the vacuolar phenotypes shown in **d-g** in the indicated lines. Statistics: Fishers Exact Test.  $p < 0.05$ . **d.** Tubule-like vacuoles. **e.** Tubule-like vacuoles with internal structures (arrows). **f.** Expanded vacuoles with internal structures (arrows). **g.** Expanded vacuoles with membrane lamination (number signs). **d-g.** Deconvolved single focal plane confocal images of apical caulonemal cells stained with MDY64 (orange). Cyan, chlorophyll autofluorescence; N, nucleus; arrowheads, internalized chloroplasts. **h.** A model for *PpPIEZO1/2* function in moss caulonemal cells.

195

196

## 197 Summary

198 Taken together, these data show that moss PIEZO homologs regulate vacuolar morphology in  
 199 apical caulonemal cells. Vacuole remodeling is linked to mechanosensing in plant cells<sup>25</sup>, and  
 200 vacuolar invagination and fragmentation occur in response to high  $[Ca^{2+}]_{cyt}$  in yeast<sup>26</sup>. We  
 201 speculate that *PpPIEZO*s release  $Ca^{2+}$  into the cytoplasm from vacuolar stores in response to the  
 202 physical state of the vacuolar membrane, which in turn leads to an increase in the surface volume  
 203 of vacuolar membranes (Fig. 4h). During WT caulonemal tip-growth, a tubule-like vacuole in the  
 204 tip may allow these exploratory cells to grow more efficiently, and to better adapt to local changes  
 205 in their environment. The work presented here also demonstrates that moss PIEZO homologs  
 206 have diverged both in cellular localization and function from their animal counterparts and  
 207 suggests that they have been co-opted to sense the mechanical status of the plant vacuolar  
 208 membrane. Like animal PIEZO channels, plant PIEZO channels still release calcium into the cytosol, just  
 209 from vacuolar rather than extracellular stores. Perhaps this relocation to the vacuole reflects a  
 210 higher freedom of movement of vacuolar membranes compared with the plasma membrane in  
 211 plant cells, making them a preferred location to sense and respond to mechanical changes within

212 the cell. Future work may reveal a multiplicity of ways in which PIEZO homologs have been  
213 adapted to the specific needs of the green lineage.

214

## 215 **Acknowledgements**

216 This work was funded by HHMI-Simons Faculty Scholar Grant 55108530 to E. S. H. and NSF  
217 MCB-1330171 to M. B. We thank Shu-zon Wu for generating the Vam3-GFP vacuolar marker,  
218 and Seyed Ali Reza Mousavi and Ardem Patapoutian for codon-optimized *AtPIEZO1* and helpful  
219 discussions.

220

## 221 **Author contributions**

222 I.R, R.R., E.W, and C.J.B. designed and performed experiments and analyzed data. I.R., R.R.,  
223 M.B., and E.S.H analyzed data and wrote the paper.

224

## 225 **Competing interests**

226 The authors declare no competing interests.

227

## 228 **References**

229

- 230 1. Bagriantsev, S. N., Gracheva, E. O. & Gallagher, P. G. Piezo proteins: Regulators of  
231 mechanosensation and other cellular processes. *J. Biol. Chem.* **289**, 31673–31681  
232 (2014).
- 233 2. Wu, J., Lewis, A. H. & Grandl, J. Touch, Tension, and Transduction – The Function and  
234 Regulation of Piezo Ion Channels. *Trends Biochem. Sci.* **42**, 57–71 (2017).
- 235 3. Coste, B. *et al.* Piezo1 and Piezo2 are essential components of distinct mechanically  
236 activated cation channels. *Science* **330**, 55–60 (2010).
- 237 4. Zhang, Z. *et al.* Genetic analysis of a Piezo-like protein suppressing systemic movement  
238 of plant viruses in *Arabidopsis thaliana*. *Sci. Rep.* **9**, 3187 (2019).
- 239 5. Durand-Smet, P. *et al.* A comparative mechanical analysis of plant and animal cells  
240 reveals convergence across kingdoms. *Biophys. J.* **107**, 2237–2244 (2014).
- 241 6. Anishkin, A., Loukin, S. H., Teng, J. & Kung, C. Feeling the hidden mechanical forces in  
242 lipid bilayer is an original sense. *Proc. Natl. Acad. Sci. U. S. A.* **111**, 7898–7905 (2014).
- 243 7. Ranaade, S. S., Syeda, R. & Patapoutian, A. Mechanically Activated Ion Channels.  
244 *Neuron* **87**, 1162–1179 (2015).
- 245 8. Basu, D. & Haswell, E. S. Plant mechanosensitive ion channels: an ocean of possibilities.



- 246 *Curr. Opin. Plant Biol.* **40**, 43–48 (2017).
- 247 9. Cox, C. D., Bavi, N. & Martinac, B. Bacterial Mechanosensors. *Annu. Rev. Physiol.* **80**,  
248 71–93 (2018).
- 249 10. Prole, D. L. & Taylor, C. W. Identification and Analysis of Putative Homologues of  
250 Mechanosensitive Channels in Pathogenic Protozoa. *PLoS One* **8**, (2013).
- 251 11. Rensing, S. A., Goffinet, B., Meyberg, R., Wu, S & Bezanilla, M. The Moss  
252 Physcomitrium ( Physcomitrella ) patens : A Model Organism for Non-Seed Plants. *Plant*  
253 *Cell* **1997**, (2020).
- 254 12. Kofuji, R. & Hasebe, M. Eight types of stem cells in the life cycle of the moss  
255 Physcomitrella patens. *Curr. Opin. Plant Biol.* **17**, 13–21 (2014).
- 256 13. Pietra, A. Della, Mikhailov, N. & Giniatullin, R. The emerging role of mechanosensitive  
257 piezo channels in migraine pain. *Int. J. Mol. Sci.* **21**, (2020).
- 258 14. Mehlmer, N. *et al.* A toolset of aequorin expression vectors for in planta studies of  
259 subcellular calcium concentrations in Arabidopsis thaliana. *J. Exp. Bot.* **63**, 1751–1761  
260 (2012).
- 261 15. Tuteja, N. & Mahajan, S. Calcium signaling network in plants: An overview. *Plant Signal.*  
262 *Behav.* **2**, 79–85 (2007).
- 263 16. Gudipaty, S. A. *et al.* Mechanical stretch triggers rapid epithelial cell division through  
264 Piezo1. *Nature* **543**, 118–121 (2017).
- 265 17. Maathuis, F. J. M. Vacuolar two-pore K<sup>+</sup> channels act as vacuolar osmosensors. *New*  
266 *Phytol.* **191**, 84–91 (2011).
- 267 18. Zhou, X. L. *et al.* The transient receptor potential channel on the yeast vacuole is  
268 mechanosensitive. *Proc. Natl. Acad. Sci. U. S. A.* **100**, 7105–7110 (2003).
- 269 19. Schönknecht, G. Calcium signals from the vacuole. *Plants* **2**, 589–614 (2013).
- 270 20. Peiter, E. The plant vacuole: Emitter and receiver of calcium signals. *Cell Calcium* **50**,  
271 120–128 (2011).
- 272 21. Tan, X. *et al.* A Review of Plant Vacuoles: Formation, Located Proteins, and Functions.  
273 *Plants* **8** (2019).
- 274 22. Cui, Y., Zhao, Q., Hu, S. & Jiang, L. Vacuole Biogenesis in Plants: How Many Vacuoles,  
275 How Many Models? *Trends Plant Sci.* **25**, 538–548 (2020).
- 276 23. Jensen, L. C. W. Division, Growth, and Branch Formation in Protonema of the Moss  
277 Physcomitrium turbinatum: Studies of Sequential Cytological Changes in Living Cells.  
278 *Protoplasma* **107**, 301–317 (1981).
- 279 24. Yi, P. & Goshima, G. Transient cotransformation of CRISPR/Cas9 and oligonucleotide

- 280 templates enables efficient editing of target loci in *Physcomitrella patens*. *Plant*  
281 *Biotechnol. J.* **18**, 599–601 (2020).
- 282 25. Dünser, K. *et al.* Extracellular matrix sensing by FERONIA and Leucine-Rich Repeat  
283 Extensins controls vacuolar expansion during cellular elongation in *Arabidopsis thaliana* .  
284 *EMBO J.* **38**, (2019).
- 285 26. Kellermayer, R., Aiello, D. P., Miseta, A. & Bedwell, D. M. Extracellular Ca<sup>2+</sup> sensing  
286 contributes to excess Ca<sup>2+</sup> accumulation and vacuolar fragmentation in a *pmr1Δ* mutant  
287 of *S. cerevisiae*. *J. Cell Sci.* **116**, 1637–1646 (2003).
- 288
- 289

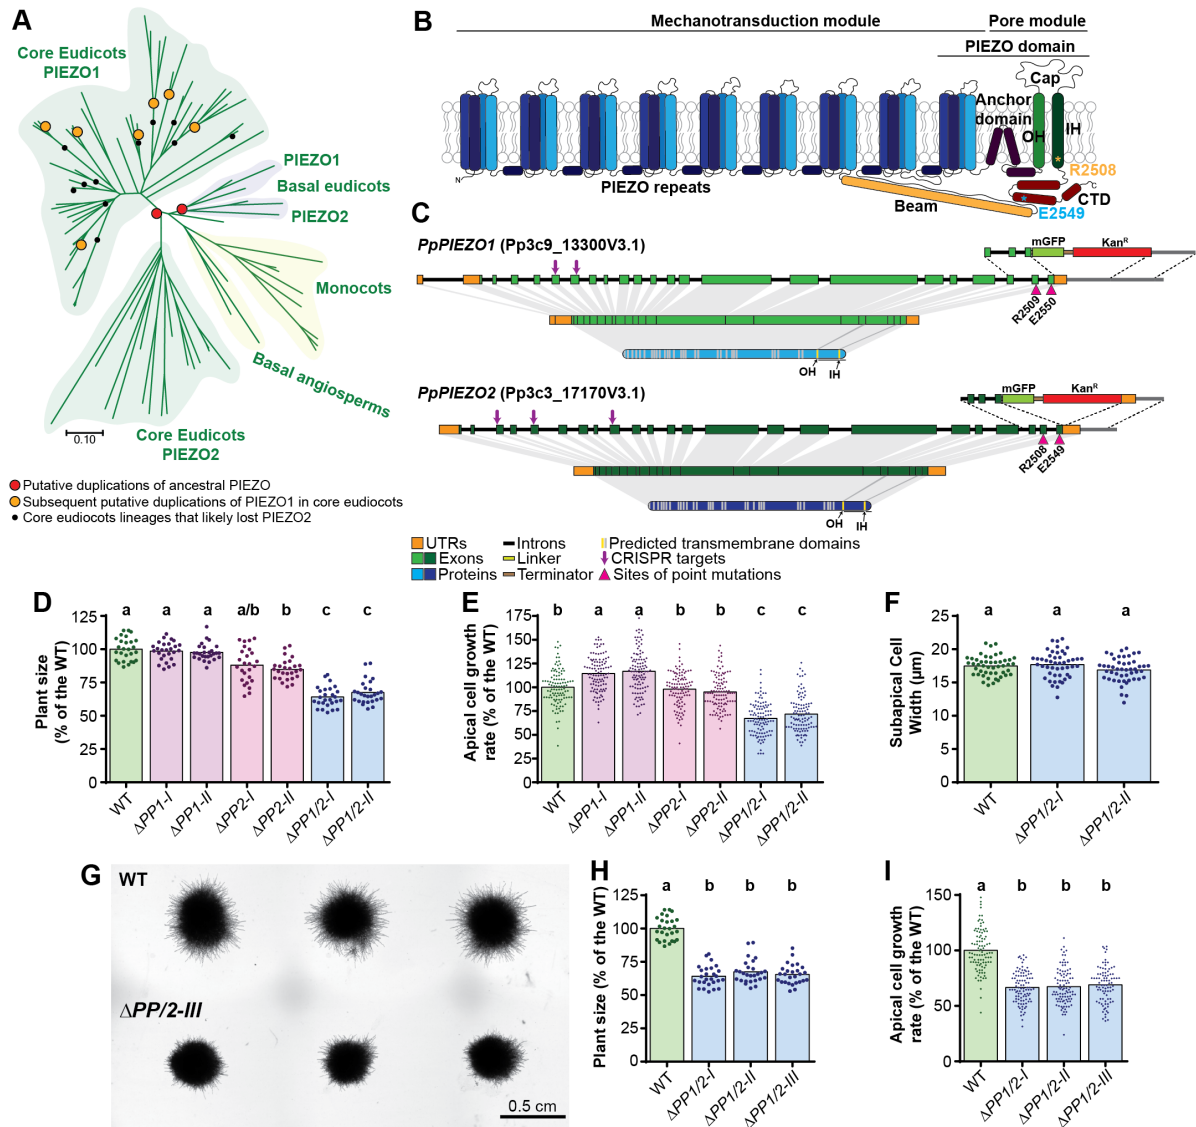

**Extended Data Figure 1. *PpPIEZO* homologs in moss are required for normal growth in moss.**

**a.** Maximum Likelihood Unrooted Phylogenetic Tree of 83 PIEZO homologs from angiosperms. Full-length PIEZO protein sequences were used to generate the tree, which is drawn to scale with branch lengths corresponding to evolutionary distances expressed as amino acid substitutions per site. For details see Supplementary Fig. 2b. Accession numbers and details about PIEZO homolog sequences used are listed in Supplementary Table 1. **b.** Model of a typical PIEZO monomer based on CryoEM structures of mouse Piezo1 and Piezo2 channels. Asterisks mark the positions of residues mutated in *PpPIEZO2* gain-of-function alleles. OH, Outer helix; IH, inner pore-lining helix; CTD, C-terminal domain **c.** Schematics of the two moss *PIEZO* loci (drawn to scale) and the corresponding mRNA and protein products. The transmembrane domains drawn were predicted by TMHMM. Arrows mark the position of the guide RNA targets used to generate *PpPIEZO* knock-out lines. Also indicated are the integration cassettes with homology arms, monomeric GFP and Kanamycin resistance genes used to generate moss knock-in lines. Arrowheads mark the positions of point mutations generated in *PpPIEZO2*. **d.** Size (area) of moss started from fragmented protonema after 7 days of growth on cellophaned BCDAT. **e.** Average tip growth rate of caulonemal cells at the plant edge. **f.** Width of subapical caulonemal cells. **g.** WT and  $\Delta PP/2-III$  (a third independently generated *PpPIEZO1/2* double mutant) after 7 days of growth on cellophaned BCDAT media. **h.** Size (area) of moss started from fragmented protonema after 7 days of growth on cellophaned BCDAT plates. Data for WT,  $\Delta PP1/2-I$  and  $-II$  is repeated from **d**. **i.** Average tip growth rate of caulonemal cells on the plant edge. Some data for WT,  $\Delta PP1/2-I$  and  $-II$  are repeated from **e**. In **d**, **e**, **h**, and **i**, graphs are a combination of three replicates, each normalized to their respective WT. Statistics: Kruskal-Wallis test with Dunn's multiple comparisons test. In **f**, graph is combination of three replicates. Statistics: one-way ANOVA with post-hoc Tukey test.  $p < 0.05$ . Average values, standard deviations and N are given in Supplementary Table 3.

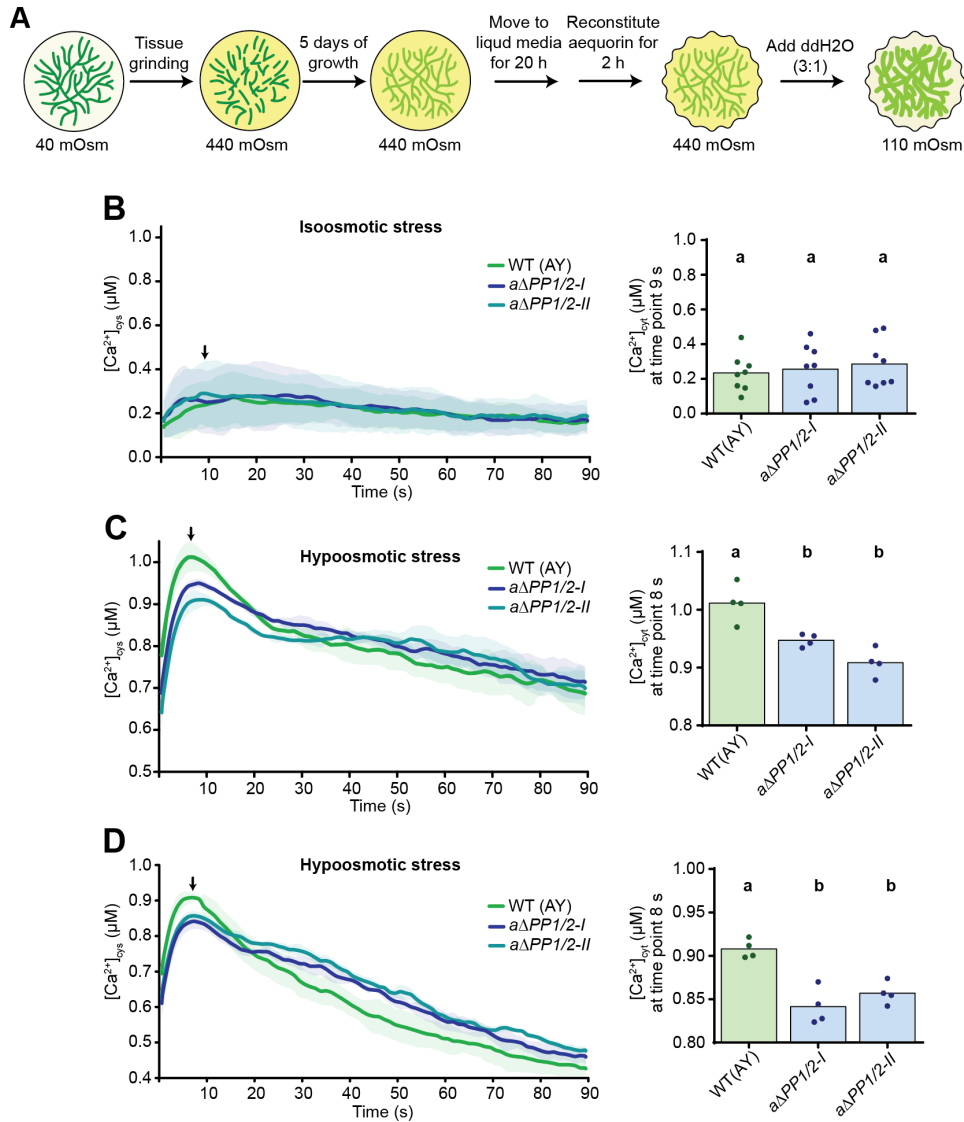

**Extended Data Figure 2. *PpPIEZO1* and *2* are necessary for full cytosolic calcium response to hypoosmotic shock.**

**a.** Schematic of the experimental setup. Numbers correspond to the calculated osmotic potential of moss media at each step. **b.** Change of cytosolic calcium concentration in response to isoosmotic media. **c, d.** Two additional replicates of cytosolic calcium concentration in response to hypoosmotic shock. Recording of bioluminescence was started immediately after the addition of water or isoosmotic media. Each line represents an average of 8 replicates for isoosmotic treatment and 4 replicates for both hypoosmotic shock. Shaded areas, standard deviation; black arrows mark the peak of the response. Cytosolic calcium concentrations for this time point are depicted on the right-hand side of each graph. Statistics, one-way ANOVA with the post-hoc Tukey test.  $p < 0.05$ . Average values, standard deviations and N are given in Supplementary Table 3.

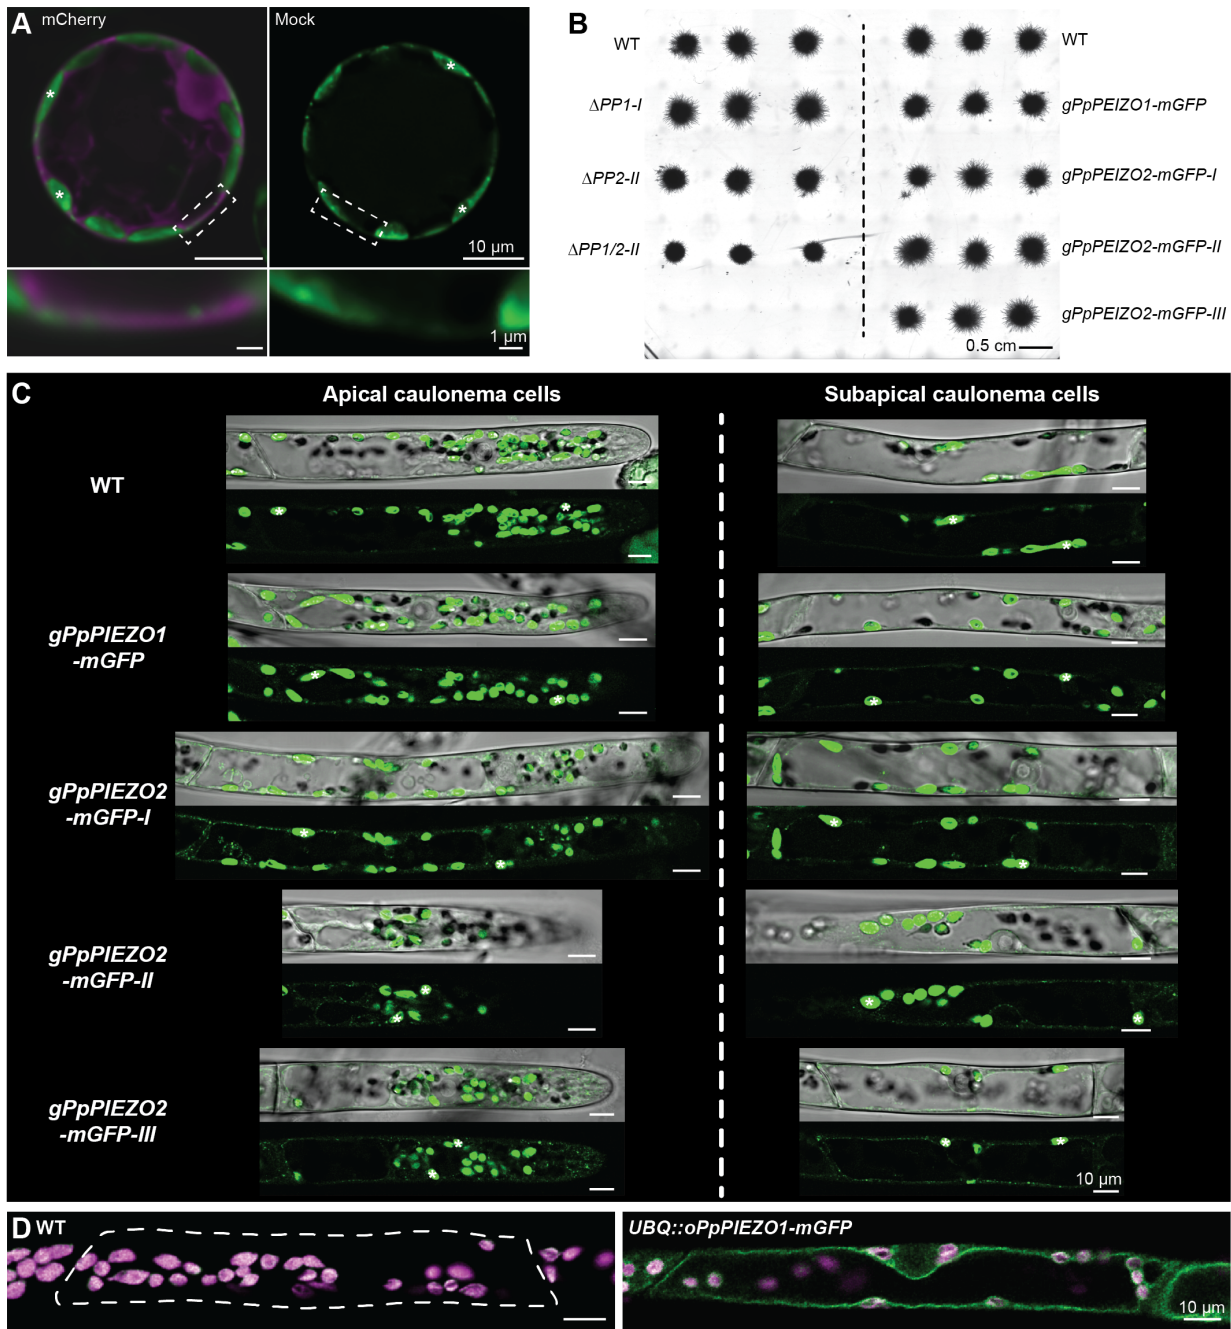

**Extended Data Figure 3. *PpPIEZO1* and *PpPIEZO2* localize to the vacuolar membrane regardless of expression level.**

**a.** Deconvolved confocal images of WT protoplasts 4 days after transformation with water or with a construct encoding cytosolic mCherry (magenta). Bottom panels are magnification of boxed areas in corresponding upper panel. **b.** Moss plants (started from fragmented protonema) of the indicated genotypes after 7 days of growth on cellophaned BCDAT media. **c.** Additional deconvolved single focal plane confocal images of *gPpPIEZO1-mGFP* and *gPpPIEZO2-mGFP* in apical and subapical caulonemal cells expressed from the native loci. Top panels, confocal image of the green channel; bottom panels, brightfield overlay. Asterisks, chlorophyll autofluorescence. **d.** Deconvolved single focal plane confocal image of subapical caulonemal cells from WT (left panel) and UBQ::oPpPIEZO1-mGFP moss (right panel). Green, mGFP; magenta, chlorophyll autofluorescence.



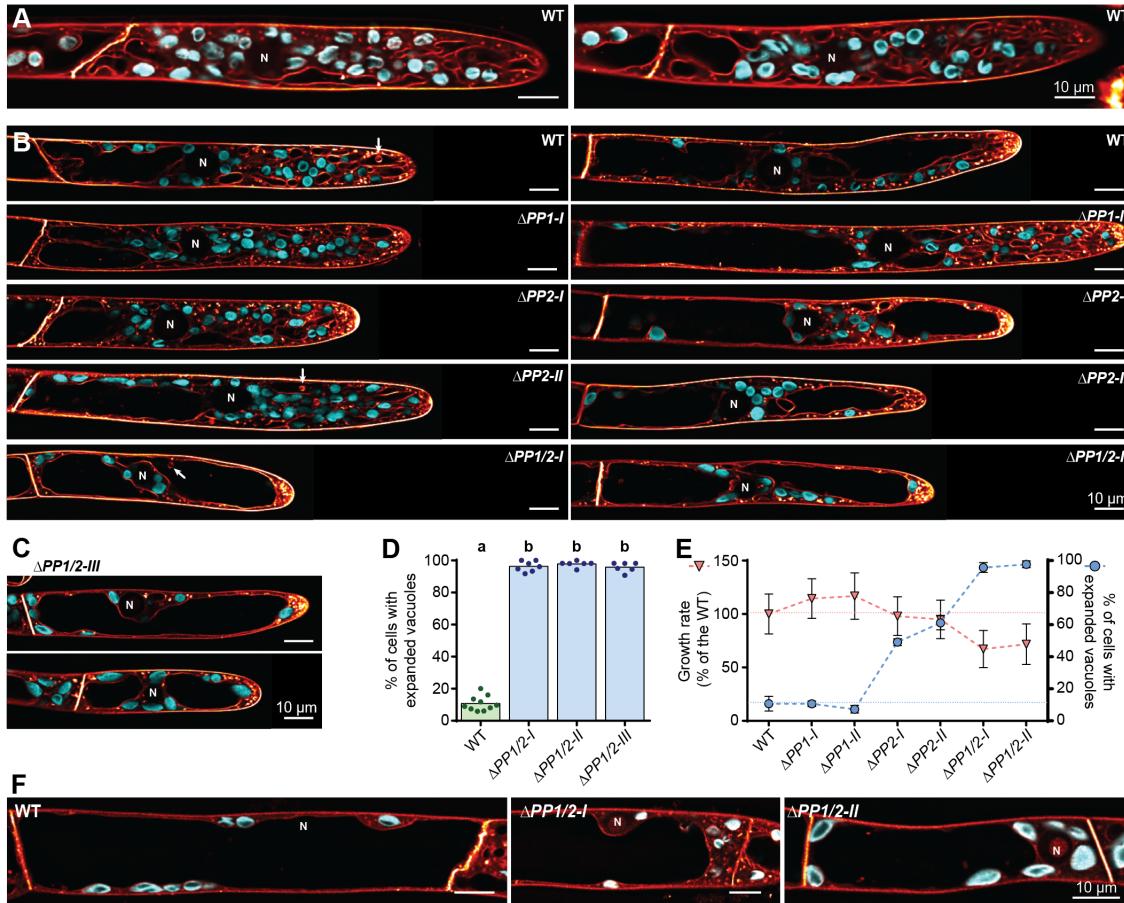

**Extended Data Figure 4. Change in the vacuolar morphology in piezo null mutants is not dependent on cell growth rate.**

**a.** Single slice deconvolved confocal images of vacuolar morphology in young, recently divided WT apical cauloneal cells stained with MDY64 (orange). Cyan, chlorophyll autofluorescence. Note tubule-like vacuolar morphology in the region between the cell base and the nucleus. **b.** Deconvolved single focal plane confocal images of vacuolar morphology in mature apical cauloneal cells from WT and *PpPIEZO* single and double mutants (same staining as in **a**). Note the expanded vacuoles in the region between cell base and nucleus. Arrows, intravacuolar membrane bubble-like structures. **c.** Examples of vacuolar morphology in  $\Delta$ PP1/2-III moss. Same staining as in **a**. **d.** Percentage of cells with expanded vacuoles in the tip region for all three  $\Delta$ PP1/2 lines. Data for WT,  $\Delta$ PP1/2-I and -II is repeated from Figure 3B. Statistics, one-way ANOVA with the post-hoc Tukey test.  $p < 0.05$ . **e.** Average growth rate normalized to that of the WT (pink triangles, data from Extended Data Fig. 1e) and percentage of apical cauloneal cells with expanded vacuoles, for WT and *PpPIEZO* single and double mutant lines. Blue circles, data from Fig. 3b. Error bars are standard deviation, while dashed lines mark average values for the WT. Note that  $\Delta$ PP2 single mutants have growth rates similar to the WT, but ~50% of apical cauloneal cells have expanded vacuoles. **f.** Single slice deconvolved confocal images of vacuolar morphology in subapical cauloneal cells from WT and  $\Delta$ PP1/2 double mutants (same staining as in **a**). N, nucleus.



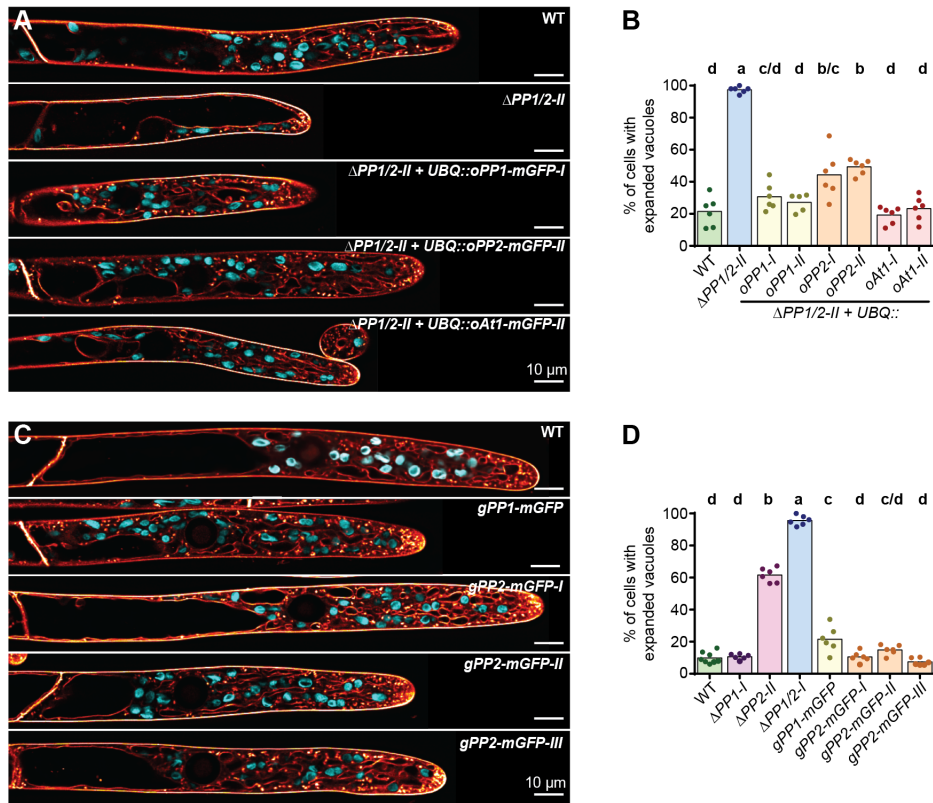

**Extended Data Figure 5. mGFP tagging does not alter the function of PpPIEZO1 and PpPIEZO2**

**a, b.** Single slice deconvolved confocal images of vacuolar morphology in apical caulonemal cells, from indicated moss lines, stained with MDY64 (orange). Cyan, chlorophyll autofluorescence. **c, d.** Percentage of cells with expanded vacuoles in the tip region. Some data for WT,  $\Delta PP1-I$ ,  $\Delta PP2-II$  and  $\Delta PP1/2-I$ , in **d**, are repeated from Figure 3b. Statistics, one-way ANOVA with the post-hoc Tukey test.  $p < 0.05$ . Average values, standard deviations and N are given in Supplementary Table 3.

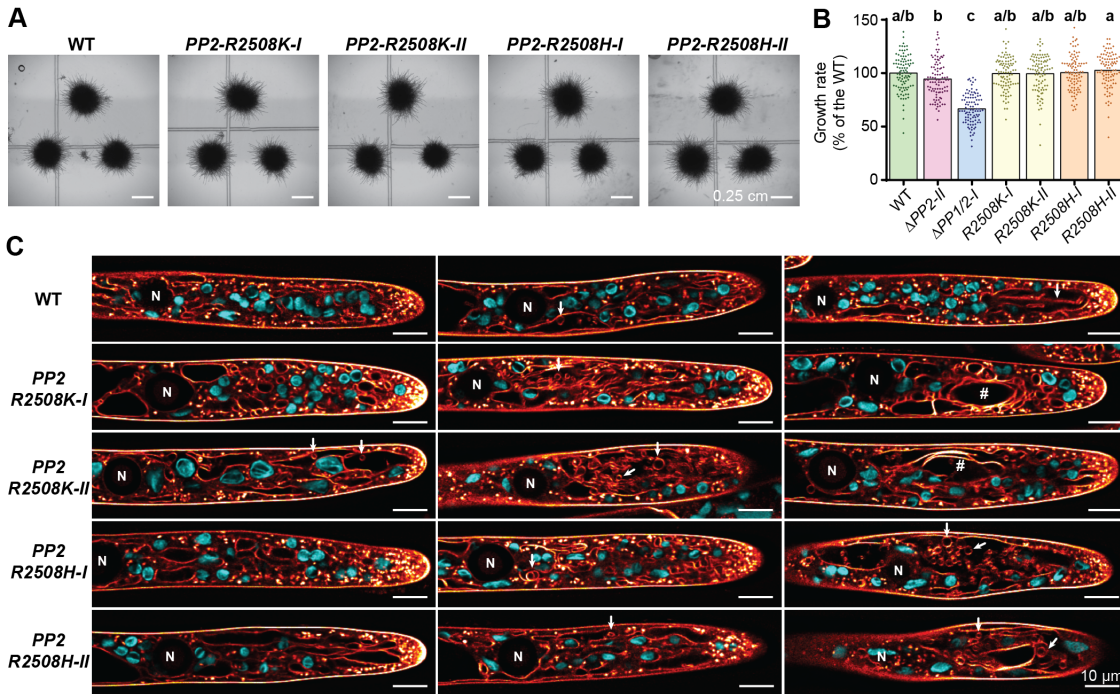

**Extended Data Figure 6. *PpPIEZO2* R2508K and R2508H mutants have normal growth rate and altered vacuolar morphology.**

**a.** Moss plants (started from fragmented protonema) of the indicated genotypes after 6 days of growth on cellophaned BCDAT media. **b.** Average tip growth rate of caulonemal cells on the plant edge. Some data for  $\Delta PP2-II$  and  $\Delta PP1/2-I$  are repeated from Extended Data Fig. 1e. Graph is a combination of three replicates, each normalized to their respective WT. Statistics: Kruskal-Wallis test with Dunn's multiple comparisons test.  $p < 0.05$ . Average values, standard deviations and N are given in Supplementary Table 3. **c.** Single slice deconvolved confocal images of vacuolar morphology in apical caulonemal cells stained with MDY64 (orange). Cyan, chlorophyll autofluorescence). Examples of cells with different vacuolar morphologies are shown: tubule-like, expanded, tubule-like vacuoles with internal structures (arrows), expanded vacuoles with internal structure (arrows) and membrane lamination (number signs). Average values, standard deviations and N are given in Supplementary Table 3.

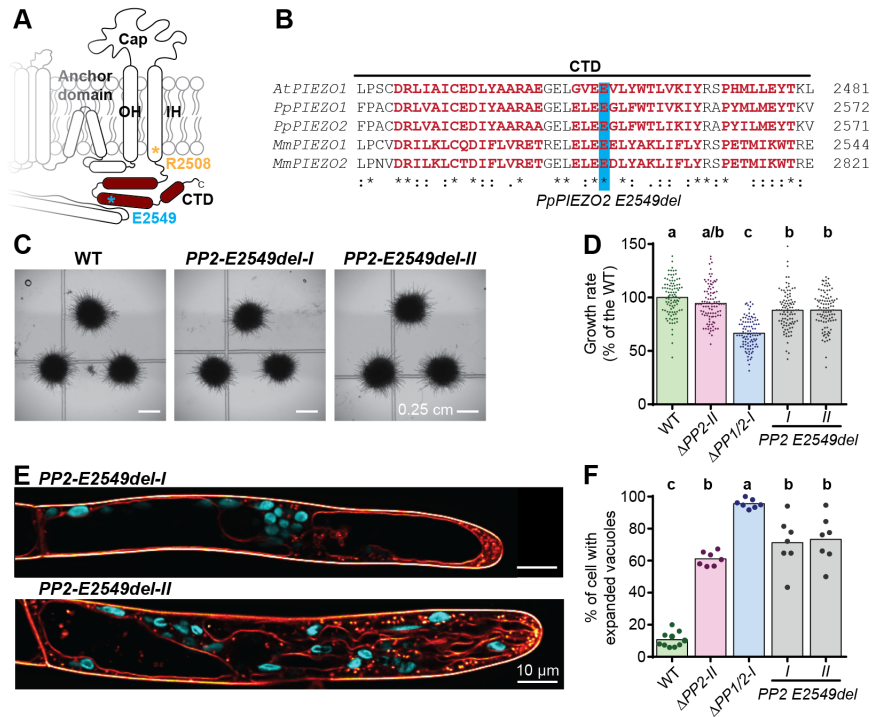

**Extended Data Figure 7. *PpPIEZO2 E2549del* produced loss-of-function phenotypes.**

**a.** Diagram of the PIEZO pore module. Asterisk, mutated residues. **b.** Alignment of C-terminal domain protein sequences from PIEZO homologs from *Arabidopsis thaliana* (*At*), *Physcomitrium patens* (*Pp*) and *Mus musculus* (*Mm*). **c.** Moss plants (started from fragmented protonema) of the indicated genotypes after 6 days of growth on cellophaned BCDAT media. **d.** Average tip growth rate of caulonemal cells on the plant edge. Some data for WT,  $\Delta PP2-II$  and  $\Delta PP1/2-I$  are repeated from Extended Data Fig. 1e. Graph is a combination of three replicates, each normalized to their respective WT. Statistics: Kruskal-Wallis test with Dunn's multiple comparisons test. **e.** Examples of vacuolar morphology in apical caulonemal cells. MDY64, orange; cyan, chlorophyll autofluorescence. **f.** Percentage of cells with expanded vacuoles in the tip region. Data for  $\Delta PP2-II$  and  $\Delta PP1/2-I$  are repeated from Figure 3b. Statistics, one-way ANOVA with the post-hoc Tukey test.  $p < 0.05$ . Average values, standard deviations and N are given in Supplementary Table 3.

297 **Methods**

298

299 **Phylogenetic analysis**

300 Full-length protein sequences of putative PIEZO homologs were identified by BLAST  
301 search of selected genomes using NCBI, Phytozome, and other databases. Sources for all protein  
302 sequences are given in Supplementary Table 1. Genomes for analysis were selected to represent  
303 as many eukaryotic lineages as possible. For those lineages where many genomes are available,  
304 only the genomes of representative species were analyzed. For flowering plants, we analyzed a  
305 larger number of genomes to help resolve the complex pattern of gene duplications and losses.

306 All homologs included in the analysis were identified by BLAST searches when either  
307 mouse mPiezo1 or mPiezo2 were used as query sequences. The only exceptions were homologs  
308 from *Mesotaenium endlicherianum*, which were identified by a direct search of predicted protein  
309 sequences using the conserved PFEW motif<sup>1,2</sup>. To further ensure that we included the best  
310 candidates, we utilized two well-known PIEZO protein characteristics: their large size (averaging  
311 around 2500 amino acids), and a very large number of predicted transmembrane domains with  
312 last two being separate from the others (Extended Data Fig. 1b). As such, all homologs included  
313 had at least 1800 amino acids and a large number of predicted transmembrane domains. The  
314 TMHMM Server v. 2.0<sup>3</sup> was used to predict the transmembrane domains. The predicted sizes and  
315 number of transmembrane domains for each homolog are given in Supplementary Table 1. If  
316 multiple isoforms of PIEZO homologs were present, only one was used for analysis.

317 Phylogenetic analysis was performed with MEGA7<sup>4</sup> software as described in<sup>5</sup>. For the tree  
318 depicted in Fig. 1a and Supplementary Figs, 1 and 3, 235 full-length protein sequences were  
319 aligned using MUSCLE<sup>6</sup> with default settings. Parts of the alignments outside of the conserved  
320 PIEZO domain (T1973 to R2543 in mouse mPiezo1) were removed and the remaining PIEZO  
321 domain sequences were realigned with MUSCLE. That alignment, with average evolutionary  
322 divergence over all sequence pairs (p-distance model) of 0.636±0.010, was used to estimate the  
323 Maximum Likelihood tree in Fig. 1a and Supplementary Fig. 1 (LG+G+I model<sup>7</sup>; +G = 09913 with  
324 5 categories; [+I] 0.30% of sites were allowed to be evolutionary invariable; only sites with 10%  
325 or fewer gaps in the alignment were included (502 sites); 500 bootstrap replications; log-likelihood  
326 = -119236.92) and the Neighbor-Joining tree<sup>8</sup> in Supplementary Fig. 3 (with JTT matrix-based  
327 method<sup>9</sup> and only sites with 10% or less gaps in the alignment = 502 sites in the final data set;  
328 1000 bootstrap replications). For the tree in Extended Data Fig. 1a and Supplementary Fig. 2b,  
329 full-length sequences of 83 angiosperm (flowering plant) PIEZO homologs, with average  
330 evolutionary divergence (p-distance model) of 0.327±0.005, were aligned using MUSCLE and

331 used to generate Maximum likelihood tree (JTT+G+I+F model<sup>9</sup>; +G = 09330 with 5 categories;  
332 [+I] 8.35% of sites were allowed to be evolutionary invariable; only sites with 10% or fewer gaps  
333 in the alignment were included (2307 sites); 500 bootstrap replications; log-likelihood -  
334 135775.95). For the tree in Supplementary Fig. 2a, full-length sequences of 73 animal PIEZO  
335 homologs, with average evolutionary divergence (p-distance model) of 0.579±0.006, were aligned  
336 using MUSCLE and used to generate Maximum likelihood tree (LG+G+I<sup>7</sup>; +G = 0.8267 with 5  
337 categories; [+I] 1.26% of sites were allowed to be evolutionary invariable; only sites with 10% or  
338 fewer gaps in the alignment were included (2104 sites); 500 bootstrap replications; log-likelihood  
339 -181869.63).

340

### 341 **Plant material and growth conditions**

342 All plant lines used in this study have been generated in the wild-type *Physcomitrium* (formerly  
343 *Physcomitrella*) *patens* (Gransden strain) background. Moss was cultured under sterile conditions  
344 on BCDAT media (1.01 mM MgSO<sub>4</sub>, 1.84 mM KH<sub>2</sub>PO<sub>4</sub>, 10 mM KNO<sub>3</sub>, 5 mM Di-ammonium  
345 tartrate, 1 mM CaCl<sub>2</sub>, 45 μM FeSO<sub>4</sub> and microelements (9.95 μM HBO<sub>3</sub>, 1.97 μM MnCl<sub>2</sub>, 0.232  
346 μM AlK(SO<sub>4</sub>)<sub>2</sub>, 0.220 μM CuSO<sub>4</sub>, 0.235 μM KBr, 0.661 μM LiCl, 0.103 μM Na<sub>2</sub>MoO<sub>4</sub>, 0.231 μM  
347 CoCl<sub>2</sub>, 0.191 μM ZnSO<sub>4</sub>, 0.169 μM KI, 0.124 μM SnCl<sub>2</sub>, 0.248 μM NiCl<sub>2</sub>), pH = 6.5 (adjusted with  
348 KOH). For solid media, 0.7% agar (Sigma-Aldrich A9799) was added. Moss was cultured in a  
349 growth chamber with 80 μmol<sub>photons</sub> m<sup>-2</sup> s<sup>-1</sup> of light under long-day conditions (16/8 h cycle with  
350 24°C/21°C day and night, respectively). Moss was cultured as described in<sup>10</sup>. For maintenance of  
351 a weekly protonemal culture, 7-day-old tissue was ground with an Omni soft-tissue homogenizer  
352 and placed on solid BCDAT media overlaid with cellophane (325P cellulose 80 mm disc from A.A.  
353 Packaging Ltd).

354

### 355 **Protoplast isolation, regeneration, and transformation**

356 Protoplasts were generated as previously described with some modification<sup>11</sup>. A 5 to 7-day-  
357 old protonemal tissue culture was scraped from solid plates and added to a 466 mM mannitol  
358 solution with 2% Driselase and Cellulase (21 unit/mL, Worthington CEL). The mixture was gently  
359 agitated for 1 h at room temperature (RT). Protoplasts were filtered through 100 μm stainless-  
360 steel mesh, spun down (200xg/ RT/ 5 min), and washed 3 times with 466 mM mannitol.

361 To regenerate plants, isolated protoplasts were spun down, resuspended in liquid plating  
362 media (1.03 MgSO<sub>4</sub>, 1.84 mM KH<sub>2</sub>PO<sub>4</sub>, 3.39 mM CaNO<sub>3</sub>, 45 μM FeSO<sub>4</sub>, 2.72 mM Di-ammonium  
363 tartrate, 10 mM CaCl<sub>2</sub>, 466 mM mannitol and microelements) and spread on cellophane covered  
364 PRMB plates (1.03 MgSO<sub>4</sub>, 1.84 mM KH<sub>2</sub>PO<sub>4</sub>, 3.39 mM CaNO<sub>3</sub>, 45 μM FeSO<sub>4</sub>, 2.72 mM Di-



365 ammonium tartrate, 10 mM CaCl<sub>2</sub>, 330 mM mannitol, microelements and solidified with 0.8%  
366 agar). After 4 days of regeneration, cellophanes with young plants were moved to regular BCDAT  
367 plates.

368 Protoplast transformations were performed as previously described with some  
369 modifications<sup>12</sup>. Protoplasts were resuspended in 3M solution (500 mM mannitol, 15 mM MgSO<sub>4</sub>,  
370 5.1 mM MES pH 5.6) to concentration of 2 million/mL. For each transformation, 300 µL of  
371 protoplasts was immediately mixed with plasmid DNA (~30 µg per plasmid, usually <10 µL) and  
372 300 µL of filter-sterilized PEG solution (4 g of melted PEG 8000 mixed with 10 mL of 420 mM  
373 mannitol, 100 mM Ca(NO<sub>3</sub>)<sub>2</sub> and 10 mM Tris pH 8.0 solution). The suspension was gently mixed  
374 by pipetting, incubated at RT for 10 min, heat-shocked for 3 min at 45°C, and incubated for another  
375 10 min in a RT water bath. Subsequently, 10 mL of 466 mM mannitol solution was added to the  
376 transformation mixture, mixed and incubated for at least 30 min at RT. Finally, the protoplasts  
377 were spun down and resuspended in liquid plating media and either left for 4 days in that media  
378 for imaging (Fig. 2a, Extended Data Fig. 3a) or spread on top of cellophane-covered PRMB plates.  
379 After 4 days of protoplast regeneration on PRMB media, cellophanes with young plants were  
380 moved to BCDAT plates with appropriate antibiotics (15 µg/mL Hygromycin, 20 µg/mL G418 or  
381 50 µg/mL Zeocin) for plant selection. For transient transformations, the selection was applied for  
382 7 days, after which the plants were moved to BCDAT plates for subsequent genotyping and  
383 propagation. For stable transformations (genome integrations), plants were selected for 7 days,  
384 followed by a week of recovery on BCDAT plates and another week on antibiotic selection, after  
385 which plants were moved to BCDAT for subsequent genotyping.

386

### 387 **Cloning of constructs used in this study**

388 **pZeo-Cas9-PpPIEZO1**. For expression of Cas9 and two guide RNAs (protospacers: 5' -  
389 TAGGTGTAGCTCGGCCGTCA - 3' and 5' - CATCAGGTCAACTGCTGGGA - 3' (Extended Data  
390 Fig. 1c), chosen with CRISPOR program<sup>13</sup>) targeting *PpPIEZO1* (Pp3c9\_13300V3.1). Primers for  
391 guide RNA 1 (5'- CCATTAGGTGCTCGGCCGTCA -3' and 5'-  
392 AAAGTACGCGCCGAGCTACACCTA -3') and guide RNA 2 (5'-  
393 CCATCATCAGGTCAACTGCTGGGA -3' and 5'- AAAGTCCCAGCAGTTGACCTGATG -3') were  
394 annealed and ligated into pENTR-PpU6P-sgRNA-L1R5 and pENTR-PpU6P-sgRNA-L5L2 as  
395 described in<sup>14</sup>. Subsequently, both guide RNA expression constructs were combined into pZeo-  
396 Cas9-gate vector<sup>14</sup>, via LR+ recombination.

397 **pZeo-Cas9-PpPIEZO2**. For expression of Cas9 and two guide RNAs (protospacers: 5' -  
398 CTCGTCCAAGGTCAGGACTA - 3' and 5' - CTGTCCAGCTGATAGCGGGA - 3' (Extended Data



399 Fig. 1c), chosen with CRISPOR program<sup>13</sup>) targeting *PpPIEZO2* (Pp3c3\_17170V3.1). Primers for  
400 guide RNA 1 (5'- CCATCTCGTCCAAGGTCAGGACTA -3' and 5'-  
401 AAAC TAGTCCTGACCTTGGACGAG -3') and guide RNA 2 (5'-  
402 CCATCTGTCCAGCTGATAGCGGGA -3' and 5'- AAAC TCCCGCTATCAGCTGGACAG -3') were  
403 annealed and ligated into pENTR-PpU6P-sgRNA-L1R5 and pENTR-PpU6P-sgRNA-L5L2 as  
404 described<sup>14</sup>. Subsequently, both guide RNA expression constructs were inserted into the pZeo-  
405 Cas9-gate vector<sup>14</sup>, via LR+ recombination.

406 ***pMH-Cas9-PpPIEZO2***. For expression of Cas9 and a guide RNA (protospacer: 5' -  
407 CTGCGCATTGCTTTGCTGT - 3' (Extended Data Fig. 1c), chosen with CRISPOR program<sup>13</sup>)  
408 targeting *PpPIEZO2* (Pp3c3\_17170V3.1). Primers for guide RNA (5'-  
409 CCATACAGCAAAGCAAATGCGCAG-3' and 5'- AAAC TCGCGCATTGCTTTGCTGT-3') were  
410 annealed and ligated into pENTR-PpU6P-sgRNA-L1L2 and as described in<sup>14</sup>. Subsequently,  
411 guide RNA expression construct was moved into pMH-Cas9-gate vector<sup>14</sup>, via LR recombination.

412 ***pTKUBI-AY***. For expression of cytosolic Aequorin-YFP (AY)<sup>15</sup> from the *UBQ* promoter. The  
413 AY coding sequence was amplified (For. 5'-CACCATGGTGAGCAAGGGCGAGG-3' and Rev. 5'-  
414 TTAGGGGACAGCTCCACCGTAG -3') and inserted into pENTR vector (D-TOPO reaction,  
415 LifeTech). Subsequently, the AY coding region was moved into expression vector pTKUBI-gate<sup>16</sup>,  
416 via LR reaction (LifeTech). Before moss transformation, the vector was linearized with PmeI.

417 ***pTHUBI-oPpPIEZO1-mGFP***. For overexpression of human codon-optimized *PpPIEZO1*  
418 (*oPpPIEZO1*) C-terminally tagged with mGFP (monomeric enhanced GFP<sup>17</sup>). We used codon-  
419 optimized PIEZO CDSs (made by gene synthesis) because native plant PIEZO genes are  
420 unstable in *E. coli*<sup>18</sup>. *oPpPIEZO1* coding sequence was synthesized with appropriate attB sites  
421 and inserted into pDONR221-P1P5r. Using LR+ recombination *oPpPIEZO1* and mGFP (in  
422 pDONR-L5L2) were inserted into pTHUBI-gate expression vector (UBQ promoter)<sup>19</sup>.

423 ***pTHUBI-oPpPIEZO2-mGFP***. Same as for *pTHUBI-oPpPIEZO1-mGFP* but with a codon-  
424 optimized version of *PpPIEZO2*.

425 ***pTHUBI-oAtPIEZO1-mGFP***. For overexpression of human codon-optimized *AtPIEZO1* (from  
426 *Arabidopsis thaliana*) C-terminally tagged with mGFP. The *oAtPIEZO1* coding sequence was  
427 amplified (5' – GGGGACAAGTTTGTACAAAAAAGCAGGCTTAATGGCTTCCTTTCTGGTGG –  
428 3' and 5' – GGGGACA ACTTTTGTATACAAAGTTGTGGCATCGTAATCCAGCTTTG – 3') and  
429 inserted into pDONR221-P1P5r. Using LR+ recombination, *oPpPIEZO1* and mGFP (in pDONR-  
430 L5L2) were inserted into a pTHUBI-gate expression vector (UBQ promoter)<sup>19</sup>.

431 ***pTZUBI-oPpPIEZO1-mGFP***. Same as for *pTHUBI-oPpPIEZO1-mGFP* but with the pTZUBI-  
432 gate<sup>16</sup> backbone. This vector was used for the transient transformation of protoplasts in Fig. 2a.

433 **pTZUBI-oPpPIEZO2-mGFP.** Same as for *pTHUBI-oPpPIEZO2-mGFP* but with the using  
434 pTZUBI-gate<sup>16</sup> backbone. This vector was used for the transient transformation of protoplasts in  
435 Fig. 2a.

436 **pMK-Cas9-PP108.** For expression of Cas9 and a guide RNA (protospacer: 5' -  
437 GAATTGGTACCAGGCTGGGT - 3', chosen with CRISPOR program<sup>13</sup>) targeting redundant  
438 PP108 (Pp3c20\_980V3.1) locus. Primers for guide RNA (5'-  
439 CCATGAATTGGTACCAGGCTGGGT -3' and 5'- AAACACCCAGCCTGGTACCAATTC -3') were  
440 annealed and ligated into pENTR-PpU6P-sgRNA-L1L2 and as described in<sup>14</sup>. Subsequently,  
441 guide RNA expression construct was moved into pMK-Cas9-gate vector<sup>14</sup>, via LR recombination.  
442 This construct was co-transformed with pTHUBI vectors, to facilitate more efficient integration into  
443 the PP108 locus.

444 **pGEM-gPP1-mGFP-Kan.** For genomic tagging (knock-in) of *PpPIEZO1* with mGFP  
445 (Extended Data Fig. 1c). The *PpPIEZO1*, 5' and 3' homology arms were amplified (5' arm: 5'-  
446 GGGGACAAGTTTGTACAAAAAGCAGGCTATTTAAATTTGACGCTCAACAAGGAG-3' / 5' -  
447 GGGGACAACCTTTTGTATACAAAGTTGTCTCCAACCTTTTGTATACTCCATC -3' and 3' arm 5' -  
448 GGGGACAACCTTTTGTATAATAAAGTTGCTATAGCATTTTGTAGGATTAATG - 3' / 5' -  
449 GGGGACCACTTTGTACAAGAAAGCTGGGTAATTTAAATGGCTCTCAGGACTATCTTAC - 3'),  
450 and inserted (BP recombination reaction) into pDONR221-P1P5r and pDONR221-P3-P2,  
451 respectively. The two arms were combined with mGFP (in pDONR221-L5L4) and Kanamycin  
452 resistance cassette (in pDONR221-R4R3) into pGem-gate<sup>17</sup> using LR+ recombination. Before  
453 moss transformation, the vector was linearized with *Swa*I.

454 **pGEM-gPP2-mGFP-Kan.** For genomic tagging (knock-in) of *PpPIEZO2* with mGFP  
455 (Extended Data Fig. 1c). The *PpPIEZO2* 5' and 3' homology arms were amplified (5' arm: 5'-  
456 GGGGACAAGTTTGTACAAAAAGCAGGCTCTCGAGAAATAGTACATGTATGGACTTGTG -3'  
457 / 5' - GGGGACAACCTTTTGTATACAAAGTTGTCTCAACCTTTTGTGTATTCCATAAG - 3' and 3'  
458 arm 5' -GGGGACAACCTTTTGTATAATAAAGTTGCTCCTCTTTGTTGCGGGAGAAG - 3' / 5' -  
459 GGGGACCACTTTGTACAAGAAAGCTGGGTAACCTCGAGAGATGCATTGGACTTTACTTTTG -  
460 3'), and inserted (BP recombination reaction) into pDONR221-P1P5r and pDONR221-P3-P2,  
461 respectively. The two homology arms were combined with mGFP (in pDONR221-L5L4) and  
462 Kanamycin resistance cassette (in pDONR221-R4R3) into pGem-gate<sup>17</sup> using LR+  
463 recombination. Before moss transformation, the vector was linearized with *Xho*I.

464 **pMH-Cas9\_PP2\_R2508.** For expression of Cas9 and a guide RNA (protospacer: 5' -  
465 TGGCAGTTGGGAGGTTTATT - 3', chosen with CRISPOR program<sup>13</sup>) targeting *PpPIEZO2*.  
466 Primers for guide RNA (5'- CCATTGGCAGTTGGGAGGTTTATT -3' and 5'-

467 AAACAATAAACCTCCCAACTGCCA -3') were annealed and ligated into pENTR-PpU6P-sgRNA-  
468 L1L2 and as described in<sup>14</sup>. Subsequently, guide RNA expression construct was moved into pMH-  
469 Cas9-gate vector<sup>14</sup>, via LR recombination. This construct was used together with annealed  
470 oligonucleotides (5'- TGGCAGTTGGGAGGTTTATTAAGTTGCAGTGCGCCGATATCCG – 3' / 5'  
471 – CGGATATCGGCGCACTGCAACTTAATAAACCTCCCAACTGCCA – 3' for R2508K and 5' –  
472 TGGCAGTGGGGAGGTTTATTCACCTGCAGTGCGCCGATATCCGT – 3' / 5' –  
473 ACGGATATCGGCGCACTGCAGGTGAATAAACCTCCCCACTGCCA for R2508H) to introduce  
474 point mutations in the genome via oligodeoxynucleotide-assisted homology-directed repair<sup>20</sup>.

475 ***pMH-Cas9\_PP2\_R2549***. Same as for *pMH-Cas9\_PP2\_R2508*, but using different guide RNA  
476 (5'- AGCTGGGGAGTTGGAGCTAG – 3', made with 5'- CCATAGCTGGGGAGTTGGAGCTAG –  
477 3' / 5' – AACCTAGCTCCAACTCCCCAGCT – 3' annealed primer) and annealed  
478 oligonucleotides (5' – GCAGCTGGGGAGTTGGAGCTCGAAGGTTTGTCTGGACATTAAT – 3'  
479 / 5' – ATTAATGTCCAGAACAAACCTTCGAGCTCCAACTCCCCAGCTGC – 3' for PP2  
480 R2549del).

481

#### 482 **Moss DNA isolation**

483 For DNA isolation, a 2-3 mm clump of moss tissue (protonema or gametophores) was  
484 mechanically disrupted (using zirconia/silica beads and a mixer mill (30 swings per s for 5 min)  
485 and mixed with 400 µL of Shorty Buffer (200 mM Tris-Cl pH 9, 400 mM LiCl, 25 mM EDTA and  
486 1% SDS). Cellular debris was spun down for 5 min at 21,000xg at RT and the supernatant was  
487 mixed 1:1 with isopropanol. After 10 min at -20°C, the solution was centrifuged for 10 min at  
488 21,000xg at RT, the supernatant discarded, and the DNA pellet was resuspended in 300 µL of  
489 TE buffer. DNA was re-precipitated with 30 µL of 3M Sodium acetate and 800 µL of absolute  
490 ethanol. The solution was incubated at -20°C (2 h), spun down for 10 min at 21000xg, washed  
491 once with 70% ethanol, spun down again for 5 min at 21000xg. The supernatant was discarded,  
492 and the pellet was air-dried and resuspended in 400 µL of TE.

493

#### 494 **Hypoosmotic shock and cytosolic calcium measurement**

495 Moss AY lines grown on BCDAT plates were ground and spread on cellophaned BCDAT  
496 plates supplemented with 400 mM mannitol, cultured for 5 days, then transferred to liquid BCDAT  
497 + 400 mM mannitol and kept in the growth chamber for another 20 h. Subsequently, plants were  
498 transferred to the same media with 1 µM coelenterazine, incubated in dark for 2 h, washed three  
499 times in BCDAT + 400 mM mannitol media, evenly distributed in wells of opaque white 96-well  
500 plates (50 µL of media per well) and left to adjust in the dark for 30 min (Extended Data Fig. 2a).

501  $\text{Ca}^{2+}$ -dependent aequorin bioluminescence was measured in a TECAN Pro200 plate reader with  
502 a 1 s integration time. Hypoosmotic stress was induced by an automatic injection of 150  $\mu\text{L}$  of  
503 double-distilled water ( $\sim 330$  mOsm drop). For the isosmotic control, 150  $\mu\text{L}$  of BCDAT + 400 mM  
504 mannitol media was injected. After iso- or hypo-osmotic treatment, 100  $\mu\text{L}$  of 1 M  $\text{CaCl}_2$  in 10%  
505 ethanol was injected into each well to discharge all remaining aequorin. The cytosolic free calcium  
506 concentration was calculated with the following formula:  $[\text{Ca}^{2+}]_{\text{cyt}} (\mu\text{M}) = 10^6 * 10^{-(5.5593 -$   
507  $0.332588 \log_{10}(C/R))$ ; where C corresponds to counts recorded per time interval (one second) and  
508 R to total remaining counts including discharge<sup>21,22</sup>.

509

### 510 **Moss growth assays**

511 In order to test the growth of different moss lines, a small amount (area of  $\sim 2$  mm<sup>2</sup>) of 7-  
512 day-old protonema tissue (from regular culture plates, see above), was shaped (using sterile  
513 tweezers) into a ball and placed on top of cellophane covered BCDAT plate. A similar amount of  
514 starting tissue was used for all moss lines tested. Under these conditions, the protonema tissue  
515 both grew in overall volume and on the edges produced caulonemal filaments<sup>23</sup>, which spread the  
516 plant (Fig. 1b, c, Extended Data Figs. 1g, 3b, 6a, 7a). Plates were sealed with breathable 3M  
517 surgical tape and cultured horizontally for 7 days under standard light conditions. Images of the  
518 growth assays were taken with a THUNDER Imager Model Organism Microscope (Leica) using  
519 a greyscale camera, 1x objective, and background illumination. Multi-tile imaging and subsequent  
520 stitching (25% overlap) was used to capture images of whole plates.

521 To determine the growth rates of the caulonemal cells on the plant edge (Expanded Data  
522 Figs. 1e, i; 6b; 7d), 7-day-old tissue was combined into 2 mm clumps and placed on 2x2 cm pieces  
523 of cellophane (3 clumps per cellophane piece). After 6 days of growth, plants were imaged with  
524 THUNDER Imager Model Organism Microscope (Leica) focusing on the plant edge. We made a  
525 4 or 8 h time-lapses (15 min per frame; 1x objective, greyscale camera, and background  
526 illumination) for each individual plant (Supplementary Fig. 4), utilizing systems motorized stage.  
527 Plates were kept sealed during imaging.

528 For dark/gravity growth assay (Fig. 1d), the 7-day-old protonemal tissue was shaped into  
529 logs ( $\sim 1$  cm long and  $\sim 2$  mm wide) and placed on top of 2x2 cm pieces of cellophane (one log per  
530 cellophane), layered over BCDAT media supplemented with 0.2% (w/v) of glucose. Plates were  
531 sealed with breathable 3M surgical tape and cultured vertically for 48 h under light, followed by  
532 10 days in the dark. Pictures were taken with the THUNDER Imager Model Organism Microscope  
533 (Leica) using a greyscale camera, 1x objective, and background illumination.

534

## 535 Moss mounting, staining, and imaging

536 For imaging transformed protoplasts (Fig. 2A; Extended Data Figs. 3a), 10  $\mu$ L of protoplast  
537 suspension was placed on the center on the slide with two small (22x22 mm) coverslips on either  
538 side as spacers. Over that, a larger (44 x 22 mm) coverslip was placed so it rested on the smaller  
539 ones. This insured that protoplasts would not be crushed by the top coverslip. The coverslips  
540 were fixed into position with drops of melted VALAP (1:1:1 mixture by weight of vaseline, paraffin,  
541 and lanolin).

542 In order to image caulonemal cells on the plant edge (Figs. 1c; 2c, d; 3a, c-e; 4d-g;  
543 Extended Data Figs. 3c, d; 4a-c, f; 5a, c; 6c, 7e), we grew protonemal tissue as described for  
544 growth assays. Clumps (~2 mm) of 7-day-old protonemal tissue were placed on cellophaned  
545 BCDAT plates and cultured for 6 days. For imaging, the whole plant was detached from the  
546 cellophane, by adding 5-10  $\mu$ L of liquid BCDAT media and placed on a coverslip at the bottom of  
547 an empty 3.5 cm Petri dish. Liquid band-aid (CVS brand) was used to attach the center of the  
548 plant to the coverslips, but care was taken that the band-aid did not reach caulonemal cells on  
549 the edge; 0.5 – 1  $\mu$ L was usually sufficient. After drying for 45-60s, the Petri dish was filled with 3  
550 mL of liquid BCDAT media.

551 In some cases (Figs. 2c, d; 3a; Extended Data Figs. 3c, d), cells were imaged directly  
552 without any staining, while in others they were first stained. For **MDY64** staining (labels the  
553 vacuolar membrane, cell wall/plasma membrane, and vesicles) (Figs. 3d, e; 4d-g; Extended Figs.  
554 4a-c, f; 5a, c, 6c, 7e), plants were first fixed to the coverslip as described above, then stained in  
555 BCDAT + 1  $\mu$ M MDY-64 (Thermofisher Y7536) for 5 min in dark, washed twice with BCDAT for 1  
556 min in light and finally mounted in 3 mL of the BCDAT media. For **BCECF** staining (accumulates  
557 in the vacuolar lumen) (Fig. 3c), plants were detached from cellophane, submerged into BCDAT  
558 + 10  $\mu$ M BCECF, AM (2',7'-Bis-(2-Carboxyethyl)-5-(and-6)-Carboxyfluorescein, Acetoxymethyl  
559 Ester; Thermofisher B1150) + 0.02% Pluronic F-127 for 1 hour in the dark, washed twice with  
560 BCDAT for 5 min in light and mounted to the coverslip as described above. For **Calcofluor-White**  
561 staining (labels cell walls) (Fig. 1c), plants were detached from cellophane, submerged into  
562 BCDAT + 0.1 mg/mL Calcofluor-White (Sigma-Aldrich F3543) for 5 min in the dark, washed twice  
563 with BCDAT for 2 min in light and mounted to the coverslip as described above.

564 Most of the confocal images (Figs. 1c; 2a, c; 3a, c-e; 4d-g; Extended Data Figs. 3a, c; 4a-  
565 c, f; 5a, c; 6c; 7e)) here made with an inverted Olympus FV3000 confocal microscope with  
566 UPLSAPO 60XW NA1.2 objective, Galvo scan unit, and High Sensitivity-Spectral Detectors,  
567 except imaged in Figs. 2d; Extended Data Fig 3d, which were made with an inverted Leica Sp8  
568 Lightning Single Photon confocal microscope (HC PL APO CS2 63Xoil NA1.4 objective, Galvo

569 scan unit, and High Sensitivity-Spectral Detectors. **mGFP** (Figs. 2; Extended Data Fig. 3a, c, d;  
570 Supplementary Fig.5) was excited by a 488 nm laser and detected in 500 - 550 nm range.  
571 **mCherry** (Figs. 2a; Extended Data Fig. 3a) was excited by a 561 nm laser and detected in the  
572 570 - 610 nm range. **MDY64** (Figs. 3d, e; 4d-g; Extended Data Fig. 4a-c, f; 5a, c; 6c; 7e) was  
573 excited by a 445 nm laser and detected in the 480-540 nm range. **BCECF** (Fig. 3c) was excited  
574 by 445 and 448 nm lasers and in both cases detected in the 500-550 nm range. **Calcofluor-**  
575 **White** (Fig. 1c) was excited by a 405 nm laser and detected in the 415-460 nm range.  
576 **Chlorophyll autofluorescence** (Figs. 1c; 2a, d; 3d, e; 4d-g; Extended Data Fig. 3a, d; 4a-c, f;  
577 5a, c; 6c; 7e; Supplementary Fig.5) was excited by 405, 445, 488, or 561 nm lasers and detected  
578 in the 660 - 700 nm range. **Bright-field** (Fig. 2c, 3a; Extended Data Fig. 3c; Supplementary Fig.5)  
579 was imaged using transmitted light detectors.

580

### 581 **Image processing and quantification**

582 For analysis of plant size (Extended Data Fig. 1d, i) (defined as the area occupied by the  
583 plan, including the spreading caulonema filaments), stitched images were exported as TIFF and  
584 analyzed in Fiji<sup>24</sup>. After the threshold (max entropy) was set, the individual plants were identified,  
585 and their area measured with Analyse particles command.

586 To measure caulonema tip growth speed (Extended Data Fig. 1e, h; 6b; 7d) the time-lapse  
587 videos made with Leica THUNDER images (see above; Supplementary Fig. 4) were exported as  
588 TIFF files and processed in Fiji. To measure the growth speed, a segmented line was drawn  
589 through the center of the growing caulonema filaments and used to generate a kymogram (see  
590 examples in Supplementary Fig. 4). The average tip growth speed was calculated from the  
591 distance the tip traversed over a specific time period.

592 To calculate an average filament curvature (Fig. 1f), we used the first frame of the time-  
593 lapse video made for tip growth rate measurement (Supplementary Fig. 4). A segmented line was  
594 drawn through the center of the caulonema filaments and used to fit a spline. The curvature radii  
595 along the draw spline were calculated with a script from Olivier Burri (Ecole Polytechnique  
596 Fédérale de Lausanne; <https://gist.github.com/lacan/42f4abe856f697e664d1062c200fd21f>). The  
597 curvature radii (in meters) were averaged for each filament and its reciprocal (curvature – k) was  
598 calculated. The obtained curvature values were converted to logarithms to obtain Gaussian  
599 distribution.

600 To determine the percentage of cells with expanded vacuoles in the tip regions of  
601 caulonemal cells (Fig. 3b; Extended Data Fig. 4d; 5b, d, 7f), moss was imaged using bright-field  
602 on Olympus FV3000 confocal microscope (UPLSAPO 60XW NA1.2 objective) and cells were



603 manually classified as either having tips filled with cell material (Fig. 3a top panel) or have large  
604 and expanded vacuole (Fig. 3a bottom panel). For each plant, approximately 50 apical  
605 caulonemal cells were evaluated and the percentage of cells with expanded vacuoles was  
606 counted as one data point.

607 Subapical caulonemal cell length and width (Fig. 1e; Extended Data Fig. 1f) was quantified  
608 in Fiji<sup>24</sup> using Maximum Z projections of Calcofluor-White stained moss images (Fig.1c). Cell  
609 length and width were measured by drawing a line along or perpendicular to the longitudinal axis  
610 of the cell, respectively. To estimate the cell width, 3 perpendicular lines were drawn in different  
611 parts of the cell and their lengths averaged.

612 Confocal microscopy images in Figs. 1c; 2a, c; 3c-e; 4d-g; Extended Data Fig. 3a, c; 4a-  
613 c, f; 5a, c; 6c; 7e; Supplementary Fig.5 were subjected to deconvolution (Olympus CellSens  
614 software, Advanced Maximum Likelihood Algorithm with 3 or 5 iterations). Color (LUT, lookup  
615 table) and display intensity range of individual channels were adjusted to facilitate clarity. The  
616 images that are meant to be compared directly (e.g. WT vs. knock-in lines in Extended Data Fig.  
617 c or images in Fig. 4e-g) were adjusted to the same intensity range. The intensity of the chlorophyll  
618 autofluorescence channel was adjusted independently from the main channel. After adjustments,  
619 the deconvolved images were captured with Microsoft Snipping Tool, saved as Portable Network  
620 Graphic (PNG) files and imported into Adobe Illustrator. Confocal microscopy images in Figs. 2d  
621 and Extended Data Fig. 3d were deconvolved using Leica LAS X software (an adaptive strategy  
622 with 5 iterations), adjusted as described above, and exported as PNG files. The following lookup  
623 tables (LUTs) were used: Calcofluor-White – Cyan; mGFP – Green; mCherry - Magenta; BCECF  
624 (445 nm excitation channel) – Magenta; MDY64 – Fall (a range LUT (from black to white over  
625 orange/yellow shades) from Olympus FV31S-SW software); Chlorophyll Autofluorescence – Red,  
626 Magenta or Cyan. No images used for data quantification were subjected to deconvolution.

627 To determine the percentage of apical caulonemal cells with different vacuolar  
628 morphologies in the tip region (Fig. 4b), deconvolved Z-stack images were manually inspected  
629 and cells were classified into one of the 5 vacuolar morphology categories. To minimize the  
630 influence of cell growth stage and other factors on vacuolar morphology variation, only mature  
631 apical caulonema cells with the expanded vacuoles in the region behind the nucleus and with  
632 overall similar cell morphology (e.g. WT cells in Fig.3a, d) were included in the quantification  
633 shown in Fig. 4b.

634

635 **Statistical analysis**

636 All statistical analysis was performed in GraphPad Prism software, except Fisher's Exact  
637 test which was performed in IBM's SPSS software. Specific tests used are indicated in the figure  
638 legends. In all tests,  $p < 0.05$  was used as a cutoff for significance.

639

#### 640 **Western blots**

641 9-day old moss plants regenerated from protoplasts were collected, excess water was  
642 removed with tissue paper, and they were ground to a fine powder in a mortar and pestle with  
643 liquid nitrogen. The powder was transferred to an Eppendorf tube, mixed 1:20 (mg:μL) with 2X  
644 sample buffer (100 mM TRIS pH6.8, 4% (w/v) SDS, 0.2% (w/v) Bromophenol Blue, 20% Glycerol  
645 (v/v), 1x protein inhibitor cocktail and 2% (v/v) mM beta-mercaptoethanol). The mixture was then  
646 vortexed, freeze-thawed in liquid nitrogen three times, incubated at 80°C for 15 min, and spun  
647 down at 21000xg for 1 min. Proteins were separated on an SDS-PAGE gel (8% running and 4%  
648 stacking gel, 1.5 mm thickness), and transferred to a PVDF membrane (BioRad) for 16 h at 4°C  
649 using a wet transfer system from BioRad (transfer buffer: 20 mM Tris, 150 mM Glycine, 20% (v/v)  
650 Methanol and 0.05% (w/v) SDS). For detection, the blot was blocked in 5% milk in TBS-T for 8h,  
651 incubated overnight at 4°C with anti-GFP (Takara 632380, 1:10000), washed in TBS-T, and then  
652 incubated with anti-mouse-HRP (Millipore-Sigma F0257 1:5000) for 1h at RT. The blot was  
653 washed in TBS-T, then detected with SuperSignal™ West Femto substrate. After detection,  
654 proteins on the PVDF membrane were stained with Coomassie for 5 min in 50% (v/v) methanol,  
655 7% (v/v) acetic acid and 0.1% (w/v) Coomassie Blue R; destained for 5 min in 50% (v/v) methanol  
656 and 7% (v/v) acetic acid, rinsed in 90% (v/v) methanol and 10% (v/v) acetic acid, and finally  
657 washed in water<sup>25</sup>.

658

#### 659 **Methods References**

- 660 1. Bagriantsev, S. N., Gracheva, E. O. & Gallagher, P. G. Piezo proteins: Regulators of  
661 mechanosensation and other cellular processes. *J. Biol. Chem.* **289**, 31673–31681 (2014).
- 662 2. Prole, D. L. & Taylor, C. W. Identification and Analysis of Putative Homologues of  
663 Mechanosensitive Channels in Pathogenic Protozoa. *PLoS One* **8**, (2013).
- 664 3. Möller, S., Croning, M. D. R. & Apweiler, R. Evaluation of methods for the prediction of  
665 membrane spanning regions. *Bioinformatics* **17**, 646–653 (2001).
- 666 4. Kumar, S., Stecher, G. & Tamura, K. MEGA7: Molecular Evolutionary Genetics Analysis  
667 Version 7.0 for Bigger Datasets. *Mol. Biol. Evol.* **33**, 1870–1874 (2016).
- 668 5. Hall, G. B. *Phylogenetic Trees Made Easy: A How-To Manual*. 5<sup>th</sup> edition. (Sinauer  
669 Associates, 2017).

- 670 6. Edgar, R. C. MUSCLE: multiple sequence alignment with high accuracy and high throughput.  
671 *Nucleic Acids Res.* **32**, 1792–1797 (2004).
- 672 7. Le, S. Q. & Gascuel, O. An improved general amino acid replacement matrix. *Mol. Biol. Evol.*  
673 **25**, 1307–1320 (2008).
- 674 8. Saitou, N. & Nei, M. The neighbor-joining method: a new method for reconstructing  
675 phylogenetic trees. *Mol. Biol. Evol.* **4**, 406–425 (1987).
- 676 9. Jones, D. T., Taylor, W. R. & Thornton, J. M. The rapid generation of mutation data matrices  
677 from protein sequences. *Bioinformatics* **8**, 275–282 (1992).
- 678 10. Cove, D. J. *et al.* Culturing the moss *Physcomitrella patens*. *Cold Spring Harb. Protoc.* **4**  
679 (2009).
- 680 11. Cove, D. J. *et al.* Isolation and regeneration of protoplasts of the moss *Physcomitrella patens*.  
681 *Cold Spring Harb. Protoc.* **4** (2009).
- 682 12. Cove, D. J. *et al.* Transformation of the moss *Physcomitrella patens* using direct DNA uptake  
683 by protoplasts. *Cold Spring Harb. Protoc.* **4** (2009).
- 684 13. Haeussler, M. *et al.* Evaluation of off-target and on-target scoring algorithms and integration  
685 into the guide RNA selection tool CRISPOR. *Genome Biol.* **17** (2016).
- 686 14. Mallett, D. R., Chang, M., Cheng, X. & Bezanilla, M. Efficient and modular CRISPR-Cas9  
687 vector system for *Physcomitrella patens*. *Plant Direct* **3**, 1–15 (2019).
- 688 15. Mehlmer, N. *et al.* A toolset of aequorin expression vectors for in planta studies of subcellular  
689 calcium concentrations in *Arabidopsis thaliana*. *J. Exp. Bot.* **63**, 1751–1761 (2012).
- 690 16. Wu, S. Z. & Bezanilla, M. Myosin VIII associates with microtubule ends and together with  
691 actin plays a role in guiding plant cell division. *Elife* **3**, e03498 (2014).
- 692 17. Vidali, L. *et al.* Rapid formin-mediated actin-filament elongation is essential for polarized plant  
693 cell growth. *Proc. Natl. Acad. Sci. U. S. A.* **106**, 13341–13346 (2009).
- 694 18. Zhang, Z. *et al.* Genetic analysis of a Piezo-like protein suppressing systemic movement of  
695 plant viruses in *Arabidopsis thaliana*. *Sci. Rep.* **9**, 3187 (2019).
- 696 19. Vidali, L., Augustine, R. C., Kleinman, K. P. & Bezanilla, M. Profilin Is Essential for Tip Growth  
697 in the Moss *Physcomitrella patens*. *Plant Cell* **19**, 3705–3722 (2007).
- 698 20. Yi, P. &  
699 Goshima, G. Transient cotransformation of CRISPR/Cas9 and oligonucleotide templates  
700 enables efficient editing of target loci in *Physcomitrella patens*. *Plant Biotechnol. J.* **18**, 599–  
701 601 (2020).
- 701 21. Plieth, C. Aequorin as a reporter gene. *Methods Mol. Biol.* **323**, 307–327 (2006).
- 702 22. Knight, H., Trewavas, A. J. & Knight, M. R. Cold Calcium Signaling in *Arabidopsis* Involves  
703 Two Cellular Pools and a Change in Calcium Signature after Acclimation. *Plant Cell* **8**, 489–

- 704 503 (1996).23. Thelander, M., Olsson, T. & Ronne, H. Effect of the energy supply on  
705 filamentous growth and development in *Physcomitrella patens*. *J. Exp. Bot.* **56**, 653-662  
706 (2005).
- 707 24. Schindelin, J. *et al.* Fiji: an open-source platform for biological-image analysis. *Nat. Methods*  
708 **9**, 676–682 (2012).
- 709 25. Welinder, C. & Ekblad, L. Coomassie staining as loading control in Western blot analysis. *J.*  
710 *Proteome Res.* **10**, 1416–1419 (2011).

711

712
